# Supplementary material for: The MBD7 complex promotes expression of methylated transgenes without significantly altering their methylation status
Source: eLife journal article supplement (doi:10.7554/elife.19893), 2017-04-28
Supplement: supp [file elife-19893-supp-v1.zip]

CLUSTAL 2.1 multiple sequence alignment

```
YJ      GTTTAAGCGTCAATTGATAGTTTAAACTGAAGCGGGAAACGACAATCTGATCCAAGCTC 60
LUCH    GTTTAAGCGTCAATTGATAGTTTAAACTGAAGCGGGAAACGACAATCTGATCCAAGCTC 60
*****

YJ      AAGCTGCTCTAGCATTGCCATT CAGGCTGCGCAACTGTTGGGAAGGGCGATCGGTGCGG 120
LUCH    AAGCTGCTCTAGCATTGCCATT CAGGCTGCGCAACTGTTGGGAAGGGCGATCGGTGCGG 120
*****

YJ      GCCTCTTCGCTATTACGCCAGCTGGCGAAAGGGGGATGTGCTGCAAGGCGATTAAGTTGG 180
LUCH    GCCTCTTCGCTATTACGCCAGCTGGCGAAAGGGGGATGTGCTGCAAGGCGATTAAGTTGG 180
*****

YJ      GTAACGCCAGGGTTTTCCAGTCACGACGTTGTA AACGACGCGCCAGTGCCAAGCTTGCA 240
LUCH    GTAACGCCAGGGTTTTCCAGTCACGACGTTGTA AACGACGCGCCAGTGCCAAGCTTGCA 240
*****

YJ      TGCCTGCAGGTCGACGGTATCGATAAGCTTGATATCGAATTCCTGCAGGTCAACATGGTG 300
LUCH    TGCCTGCAGGTCGACGGTATCGATAAGCTTGATATCGAATTCCTGCAGGTCAACATGGTG 300
*****

YJ      GAGCACGACACACTTGCTACTC CAAAAATATCAAAGATACAGTCTCAGAAGACCAAAGG 360
LUCH    GAGCACGACACACTTGCTACTC CAAAAATATCAAAGATACAGTCTCAGAAGACCAAAGG 360
*****

YJ      GCAATTGAGACTTTTCAACAAAGGGTAATATCCGGAAACCTCCTCGGATTCCATTGCCCA 420
LUCH    GCAATTGAGACTTTTCAACAAAGGGTAATATCCGGAAACCTCCTCGGATTCCATTGCCCA 420
*****

YJ      GCTATCTGTCAC TTTATTGTGAAGATAGTGGAAAAGGAAGGTGGCTCCTACAAATGCCAT 480
LUCH    GCTATCTGTCAC TTTATTGTGAAGATAGTGGAAAAGGAAGGTGGCTCCTACAAATGCCAT 480
*****

YJ      CATTGCGATAAAGGAAAGGCCATCGTTGAAGATGCCTCTGCCGACAGTGGTCCCAAAGAT 540
LUCH    CATTGCGATAAAGGAAAGGCCATCGTTGAAGATGCCTCTGCCGACAGTGGTCCCAAAGAT 540
*****

YJ      GGACCCCCACCCACGAGGAGCATCGTGGAAAAGAAGACGTTCCAACCACGTCTTCAAAG 600
LUCH    GGACCCCCACCCACGAGGAGCATCGTGGAAAAGAAGACGTTCCAACCACGTCTTCAAAG 600
*****

YJ      CAAGTGGATTGATGTGATAACGTGGTGGAGCACGACACACTTGCTACTC CAAAAATATC 660
LUCH    CAAGTGGATTGATGTGATAACGTGGTGGAGCACGACACACTTGCTACTC CAAAAATATC 660
*****

YJ      AAAGATACAGTCTCAGAAGACCAAAGGGCAATTGAGACTTTTCAACAAAGGGTAATATCC 720
LUCH    AAAGATACAGTCTCAGAAGACCAAAGGGCAATTGAGACTTTTCAACAAAGGGTAATATCC 720
*****

YJ      GGAAACCTCCTCGGATTCCATTGCCAGCTATCTGTCACTTTATTGTGAAGATAGTGGAA 780
LUCH    GGAAACCTCCTCGGATTCCATTGCCAGCTATCTGTCACTTTATTGTGAAGATAGTGGAA 780
*****

YJ      AAGGAAGGTGGCTCCTACGAATGCCATCATTGCGATAAAGGAAAGGCCATCGTTGAAGAT 840
LUCH    AAGGAAGGTGGCTCCTACGAATGCCATCATTGCGATAAAGGAAAGGCCATCGTTGAAGAT 840
*****

YJ      GCCTCTGCCGACAGTGGTCCCAAAGATGGACCCCCACCCACGAGGAGCATCGTGGAAAAA 900
```

LUCH GCCTCTGCCGACAGTGGTCCCAAAGATGGACCCCCACCCACGAGGAGCATCGTGGAAAAA 900  
 \*\*\*\*\*  
 YJ GAAGACGTTCCAACCACGTCTTCAAAGCAAGTGGATTGATGTGATATCTCCACTGACGTA 960  
 LUCH GAAGACGTTCCAACCACGTCTTCAAAGCAAGTGGATTGATGTGATATCTCCACTGACGTA 960  
 \*\*\*\*\*  
 YJ AGGGATGACGCACAATCCCACTATCCTTCGCAAGACCCTTCTCTATATAAGGAAGTTCA 1020  
 LUCH AGGGATGACGCACAATCCCACTATCCTTCGCAAGACCCTTCTCTATATAAGGAAGTTCA 1020  
 \*\*\*\*\*  
 YJ TTTCAATTTGGAGAGGACCTCGAGAATTCTCAACACAACATATACAAAACAAACGAATCTC 1080  
 LUCH TTTCAATTTGGAGAGGACCTCGAGAATTCTCAACACAACATATACAAAACAAACGAATCTC 1080  
 \*\*\*\*\*  
 YJ AAGCAATCAAGCATTCTACTTCTATTGCAGCAATTTAAATCATTCTTTTAAAGCAAAG 1140  
 LUCH AAGCAATCAAGCATTCTACTTCTATTGCAGCAATTTAAATCATTCTTTTAAAGCAAAG 1140  
 \*\*\*\*\*  
 YJ CAATTTTCTGAAAATTTTACCATTTACGAACGATAGCCATGGAAGACGCCAAAAACATA 1200  
 LUCH CAATTTTCTGAAAATTTTACCATTTACGAACGATAGCCATGGAAGACGCCAAAAACATA 1200  
 \*\*\*\*\*  
 YJ AAGAAAGGCCCGGCGCCATTCTATCCGCTGGAAGATGGAACCGCTGGAGAGCAACTGCAT 1260  
 LUCH AAGAAAGGCCCGGCGCCATTCTATCCGCTGGAAGATGGAACCGCTGGAGAGCAACTGCAT 1260  
 \*\*\*\*\*  
 YJ AAGGCTATGAAGAGATACGCCCTGGTTCTGGAACAATTGCTTTTACAGATGCACATATC 1320  
 LUCH AAGGCTATGAAGAGATACGCCCTGGTTCTGGAACAATTGCTTTTACAGATGCACATATC 1320  
 \*\*\*\*\*  
 YJ GAGGTGGACATCACTTACGCTGAGTACTTCGAAATGTCCGTTTCGGTTGGCAGAAGCTATG 1380  
 LUCH GAGGTGGACATCACTTACGCTGAGTACTTCGAAATGTCCGTTTCGGTTGGCAGAAGCTATG 1380  
 \*\*\*\*\*  
 YJ AAACGATATGGGCTGAATACAAATCACAGAATCGTCGATGCAGTGAAAACCTCTCTTCAA 1440  
 LUCH AAACGATATGGGCTGAATACAAATCACAGAATCGTCGATGCAGTGAAAACCTCTCTTCAA 1440  
 \*\*\*\*\*  
 YJ TTCTTTATGCCGGTGTGGGCGCGTTATTTATCGGAGTTGCAGTTGCGCCCGCAACGAC 1500  
 LUCH TTCTTTATGCCGGTGTGGGCGCGTTATTTATCGGAGTTGCAGTTGCGCCCGCAACGAC 1500  
 \*\*\*\*\*  
 YJ ATTTATAATGAACGTGAATTGCTCAACAGTATGGGCATTTTCGAGCCTACCGTGGTGTTT 1560  
 LUCH ATTTATAATGAACGTGAATTGCTCAACAGTATGGGCATTTTCGAGCCTACCGTGGTGTTT 1560  
 \*\*\*\*\*  
 YJ GTTTCCAAAAGGGGTTGCAAAAATTTTGAACGTGCAAAAAGCTCCCAATCATCCAA 1620  
 LUCH GTTTCCAAAAGGGGTTGCAAAAATTTTGAACGTGCAAAAAGCTCCCAATCATCCAA 1620  
 \*\*\*\*\*  
 YJ AAAATTATTATCATGGATTCTAAAACGGATTACCAGGGATTTTCAGTCGATGTACACGTTT 1680  
 LUCH AAAATTATTATCATGGATTCTAAAACGGATTACCAGGGATTTTCAGTCGATGTACACGTTT 1680  
 \*\*\*\*\*  
 YJ GTCACATCTCATCTACCTCCCGTTTTAATGAATACGATTTTGTGCCAGAGTCCTTCGAT 1740  
 LUCH GTCACATCTCATCTACCTCCCGTTTTAATGAATACGATTTTGTGCCAGAGTCCTTCGAT 1740  
 \*\*\*\*\*  
 YJ AGGGACAAGACAATTGCACTGATCATGAACTCCTCTGGATCTACTGGTCTGCCTAAAGGT 1800  
 LUCH AGGGACAAGACAATTGCACTGATCATGAACTCCTCTGGATCTACTGGTCTGCCTAAAGGT 1800

\*\*\*\*\*

YJ GTCGCTCTGCCTCATAGAAGTGCCTGCGTGAGATTCTCGCATGCCAGAGATCCATATTTT 1860  
LUCH GTCGCTCTGCCTCATAGAAGTGCCTGCGTGAGATTCTCGCATGCCAGAGATCCATATTTT 1860  
\*\*\*\*\*

YJ GGCAATCAAATCATTCCGGATACTGCGATTTTAAAGTGTGTTCCATTCCATCACGGTTTT 1920  
LUCH GGCAATCAAATCATTCCGGATACTGCGATTTTAAAGTGTGTTCCATTCCATCACGGTTTT 1920  
\*\*\*\*\*

YJ GGAATGTTTACTTACACTCGGATATTTGATATGTGGATTTGAGTCGTCTTAATGTATAGA 1980  
LUCH GGAATGTTTACTTACACTCGGATATTTGATATGTGGATTTGAGTCGTCTTAATGTATAGA 1980  
\*\*\*\*\*

YJ TTTGAAGAAGAGCTGTTTCTGAGGAGCCTTCAGGATTACAAGATTCAAAGTGCCTGCTG 2040  
LUCH TTTGAAGAAGAGCTGTTTCTGAGGAGCCTTCAGGATTACAAGATTCAAAGTGCCTGCTG 2040  
\*\*\*\*\*

YJ GTGCCAACCTATTCTCCTTCTTCGCCAAAAGCACTCTGATTGACAAATACGATTTATCT 2100  
LUCH GTGCCAACCTATTCTCCTTCTTCGCCAAAAGCACTCTGATTGACAAATACGATTTATCT 2100  
\*\*\*\*\*

YJ AATTTACACGAAATTGCTTCTGGTGGCGCTCCCCTCTCTAAGGAAGTCGGGAAGCGGTT 2160  
LUCH AATTTACACGAAATTGCTTCTGGTGGCGCTCCCCTCTCTAAGGAAGTCGGGAAGCGGTT 2160  
\*\*\*\*\*

YJ GCCAAGAGGTTCCATCTGCCAGGTATCAGGCAAGGATATGGGCTCACTGAGACTACATCA 2220  
LUCH GCCAAGAGGTTCCATCTGCCAGGTATCAGGCAAGGATATGGGCTCACTGAGACTACATCA 2220  
\*\*\*\*\*

YJ GCTATTCTGATTACACCCGAGGGGGATGATAAACC GGCGCGGTTCGGTAAAGTTGTTCCA 2280  
LUCH GCTATTCTGATTACACCCGAGGGGGATGATAAACC GGCGCGGTTCGGTAAAGTTGTTCCA 2280  
\*\*\*\*\*

YJ TTTTTGAAGCGAAGGTTGTGGATCTGGATACCGGAAAACGCTGGGCGTTAATCAAAGA 2340  
LUCH TTTTTGAAGCGAAGGTTGTGGATCTGGATACCGGAAAACGCTGGGCGTTAATCAAAGA 2340  
\*\*\*\*\*

YJ GGCGAACTGTGTGTGAGAGGTCCTATGATTATGTCCGTTATGTAAACAATCCGGAAGCG 2400  
LUCH GGCGAACTGTGTGTGAGAGGTCCTATGATTATGTCCGTTATGTAAACAATCCGGAAGCG 2400  
\*\*\*\*\*

YJ ACCAACGCCTTGATTGACAAGGATGGATGGCTACATTCTGGAGACATAGCTTACTGGGAC 2460  
LUCH ACCAACGCCTTGATTGACAAGGATGGATGGCTACATTCTGGAGACATAGCTTACTGGGAC 2460  
\*\*\*\*\*

YJ GAAGACGAACACTTCTTCATCGTTGACCGCCTGAAGTCTCTGATTAAGTACAAAGGCTAT 2520  
LUCH GAAGACGAACACTTCTTCATCGTTGACCGCCTGAAGTCTCTGATTAAGTACAAAGGCTAT 2520  
\*\*\*\*\*

YJ CAGGTGGCTCCCGCTGAATTGGAATCCATCTTGCTCCAACACCCCAACATCTTCGACGCA 2580  
LUCH CAGGTGGCTCCCGCTGAATTGGAATCCATCTTGCTCCAACACCCCAACATCTTCGACGCA 2580  
\*\*\*\*\*

YJ GGTGTCGCAGGTTCTCCCGACGATGACGCCGGTGAACCTCCCGCCCGGTTGTTGTTTTG 2640  
LUCH GGTGTCGCAGGTTCTCCCGACGATGACGCCGGTGAACCTCCCGCCCGGTTGTTGTTTTG 2640  
\*\*\*\*\*

YJ GAGCACGAAAGACGATGACGGAAAAAGAGATCGTGGATTACGTCGCCAGTCAAGTAACA 2700  
LUCH GAGCACGAAAGACGATGACGGAAAAAGAGATCGTGGATTACGTCGCCAGTCAAGTAACA 2700  
\*\*\*\*\*

YJ ACCGCGAAAAAGTTGCGCGGAGGAGTTGTGTTTGTGGACGAAGTACCGAAAAGGTTCTTACC 2760  
LUCH ACCGCGAAAAAGTTGCGCGGAGGAGTTGTGTTTGTGGACGAAGTACCGAAAAGGTTCTTACC 2760  
\*\*\*\*\*

YJ GGAAAACCTCGACGCAAGAAAAATCAGAGAGATCCTCATAAAGGCCAAGAAGGGCGGAAAG 2820  
LUCH GGAAAACCTCGACGCAAGAAAAATCAGAGAGATCCTCATAAAGGCCAAGAAGGGCGGAAAG 2820  
\*\*\*\*\*

YJ ATCGCCGTGTAATTCTAGAGATTCTCTGTGTAAGCG---AAAGTCTAGAGTCCGCAAAA 2876  
LUCH ATCGCCGTGGGATCCCACCGTTTTGATGGTCGGGCTCGACGAACCAAGTGTGACAAAT 2880  
\*\*\*\*\* .\*\* \* \* .\*\* .\*\* ..\*\* ..\* .:\*\*\*:\* .\*\*\*:

YJ -----ATCACCAG---TCTCT-CTCTACAATCTATCT-----CTCTCTAT 2913  
LUCH GCTGCAGCATCATCAGATTCTCTCCTCATCATCACAATCAGATTTTTAATTCTACTTCT 2940  
\*\*\*\* \*\* \*\*\*\*\* \*\*:\*.\*:\*.\*\*\*: \*\* \*.\*

YJ TTTTCTCCAGAATAATGTGTGAG-----TAGTCCAG-----ATAAGGGAATTA 2958  
LUCH ACTCCTCATCAAAATTGGCTGCAGACAAATGGCTTCCAACCTCCTCTCATGAGACCTTCT 3000  
: \* \*\*\*: .\*\*:\*.\* \*\*.. \*.\* \* \*\*\*. \*\*.\*. :.\* :

YJ GGGTTCTTATA-----GGTTTTCGCTCATGTGTTGAGCATATAAGAAACCTTAGT 3009  
LUCH TGAATCTTTTATATTTTAAGGTTTATTATTATATAAGAAAAACAAAAATGAACCTTTGA 3060  
\*.:\*\*\*\*:\* \*\* \*\*: .\* \*\*\*: .\*. \* \* \*\*\*. :.\* \*\*\*. :.\*

YJ ATG---TATTTGTATTTGTAATAACTTCTATCAAT---AAAATTTCTAATTCCTAAAAC 3063  
LUCH AATCCCCACATGTTCTTGGTCATTTCATTAAATCATCGGCTTATATTTTGGCTTATTTTCCC 3120  
\*: \* :\*\*\*: \*\* .\*:\*\*\*:\* :\*\*\*\*: :\*:\*\*\* \*..\* .\*:..\*

YJ CAAAATCCAG-TGACCTGCAGGTCGACTCTAGAGGATCCCCGGGTACCGAG---CTCGAA 3119  
LUCH CTAATCCTCTTGTAACTTAGGCGAACAAAAAAATTAATGGAAATCTTTTTCCCTGAA 3180  
\*:\*\*\*\*\*: \*\*: .: .:\* \*\*\*. :.\*.\* \*\* .. \*\*:\* \* : \* \*\*

YJ TTCGTAATCATGGTCATAGCTGTTTCTGTGTGAAATTGTTATCCGCTCACAATTCCACA 3179  
LUCH TTCGTAATCATG-TCATAGCTGTTTCTGTGTGAAATTGTTATCCGCTCACAATTCCACA 3239  
\*\*\*\*\*

YJ CAACATACGAGCCGGAAGCATAAAGTGTAAGCCTGGGGTGCCTAATGAGTGAGCTAACT 3239  
LUCH CAACATACGAGCCGGAAGCATAAAGTGTAAGCCTGGGGTGCCTAATGAGTGAGCTAACT 3299  
\*\*\*\*\*

YJ CACATTAATTGCGTTGCGCTCACTGCCCGCTTCCAGTCGGGAAACCTGTCGTGCCAGCT 3299  
LUCH CACATTAATTGCGTTGCGCTCACTGCCCGCTTCCAGTCGGGAAACCTGTCGTGCCAGCT 3359  
\*\*\*\*\*

YJ GCATTAATGAATCGGCAACGCGCGGGGAGAGGCGGTTTTCGCTATTGGCTAGAGCAGCTT 3359  
LUCH GCATTAATGAATCGGCAACGCGCGGGGAGAGGCGGTTTTCGCTATTGGCTAGAGCAGCTT 3419  
\*\*\*\*\*

YJ GCCAACATGGTGGAGCAGGACTCTCGTCTACTCCAAGAATATCAAAGATACAGTCTCA 3419  
LUCH GCCAACATGGTGGAGCAGGACTCTCGTCTACTCCAAGAATATCAAAGATACAGTCTCA 3479  
\*\*\*\*\*

YJ GAAGACCAAAGGGCTATTGAGACTTTTCAACAAAGGGTAATATCGGGAAACCTCCTCGGA 3479  
LUCH GAAGACCAAAGGGCTATTGAGACTTTTCAACAAAGGGTAATATCGGGAAACCTCCTCGGA 3539  
\*\*\*\*\*

YJ TTCCATTGCCAGCTATCTGTCACTTCATCAAAGGACAGTAGAAAAGGAAGGTGGCACC 3539  
LUCH TTCCATTGCCAGCTATCTGTCACTTCATCAAAGGACAGTAGAAAAGGAAGGTGGCACC 3599  
\*\*\*\*\*

YJ TACAAATGCCATCATTGCGATAAAGGAAAGGCTATCGTTCAAGATGCCTCTGCCGACAGT 3599  
LUCH TACAAATGCCATCATTGCGATAAAGGAAAGGCTATCGTTCAAGATGCCTCTGCCGACAGT 3659  
\*\*\*\*\*

YJ GGTCCCAAAGATGGACCCCCACCCACGAGGAGCATCGTGAAAAAGAAGACGTTCCAACC 3659  
LUCH GGTCCCAAAGATGGACCCCCACCCACGAGGAGCATCGTGAAAAAGAAGACGTTCCAACC 3719  
\*\*\*\*\*

YJ ACGTCTTCAAAGCAAGTGGATTGATGTGATAACATGGTGGAGCACGACACTCTCGTCTAC 3719  
LUCH ACGTCTTCAAAGCAAGTGGATTGATGTGATAACATGGTGGAGCACGACACTCTCGTCTAC 3779  
\*\*\*\*\*

YJ TCCAAGAATATCAAAGATACAGTCTCAGAAGACCAAAGGGCTATTGAGACTTTTCAACAA 3779  
LUCH TCCAAGAATATCAAAGATACAGTCTCAGAAGACCAAAGGGCTATTGAGACTTTTCAACAA 3839  
\*\*\*\*\*

YJ AGGGTAATATCGGGAAACCTCCTCGGATTCCATTGCCAGCTATCTGTCACTTCATCAAA 3839  
LUCH AGGGTAATATCGGGAAACCTCCTCGGATTCCATTGCCAGCTATCTGTCACTTCATCAAA 3899  
\*\*\*\*\*

YJ AGGACAGTAGAAAAGGAAGGTGGCACCTACAAATGCCATCATTGCGATAAAGGAAAGGCT 3899  
LUCH AGGACAGTAGAAAAGGAAGGTGGCACCTACAAATGCCATCATTGCGATAAAGGAAAGGCT 3959  
\*\*\*\*\*

YJ ATCGTTCAAGATGCCTCTGCCGACAGTGGTCCCAAAGATGGACCCCCACCCACGAGGAGC 3959  
LUCH ATCGTTCAAGATGCCTCTGCCGACAGTGGTCCCAAAGATGGACCCCCACCCACGAGGAGC 4019  
\*\*\*\*\*

YJ ATCGTGGAAAAAGAAGACGTTCCAACCACGTCTTCAAAGCAAGTGGATTGATGTGATATC 4019  
LUCH ATCGTGGAAAAAGAAGACGTTCCAACCACGTCTTCAAAGCAAGTGGATTGATGTGATATC 4079  
\*\*\*\*\*

YJ TCCACTGACGTAAGGGATGACGCACAATCCCACTATCCTTCGCAAGACCCTTCCTCTATA 4079  
LUCH TCCACTGACGTAAGGGATGACGCACAATCCCACTATCCTTCGCAAGACCCTTCCTCTATA 4139  
\*\*\*\*\*

YJ TAAGGAAGTTCATTTCAATTTGGAGAGGACACGCTGAAATCACCAGTCTCTCTACAAAT 4139  
LUCH TAAGGAAGTTCATTTCAATTTGGAGAGGACACGCTGAAATCACCAGTCTCTCTACAAAT 4199  
\*\*\*\*\*

YJ CTATCTCTCGATTTCGAGATCTGTCGATCGACCATGGGGATTGAACAAGATGGATTGC 4199  
LUCH CTATCTCTCGATTTCGAGATCTGTCGATCGACCATGGGGATTGAACAAGATGGATTGC 4259  
\*\*\*\*\*

YJ ACGCAGGTTCTCCGGCCGCTTGGGTGGAGAGGCTATTCGGCTATGACTGGGCACAACAGA 4259  
LUCH ACGCAGGTTCTCCGGCCGCTTGGGTGGAGAGGCTATTCGGCTATGACTGGGCACAACAGA 4319  
\*\*\*\*\*

YJ CAATCGGCTGCTCTGATGCCGCCGTGTTCCGGCTGTCAGCGCAGGGGCGCCCGTTCTTT 4319  
LUCH CAATCGGCTGCTCTGATGCCGCCGTGTTCCGGCTGTCAGCGCAGGGGCGCCCGTTCTTT 4379  
\*\*\*\*\*

YJ TTGTCAAGACCGACCTGTCCGGTGCCCTGAATGAACTCCAGGACGAGGCAGCGCGGCTAT 4379  
LUCH TTGTCAAGACCGACCTGTCCGGTGCCCTGAATGAACTCCAGGACGAGGCAGCGCGGCTAT 4439  
\*\*\*\*\*

YJ CGTGGCTGGCCACGACGGGCGTTCCTTGCAGCTGTGCTCGACGTTGTCAGTGAAGCGG 4439  
LUCH CGTGGCTGGCCACGACGGGCGTTCCTTGCAGCTGTGCTCGACGTTGTCAGTGAAGCGG 4499  
\*\*\*\*\*

YJ GAAGGGACTGGCTGCTATTGGGCGAAGTGCCGGGGCAGGATCTCCTGTCATCTCACCTTG 4499

LUCH GAAGGGACTGGCTGCTATTGGGCGAAGTGCCGGGGCAGGATCTCTGTCATCTCACCTTG 4559  
\*\*\*\*\*

YJ CTCCTGCCGAGAAAGTATCCATCATGGCTGATGCAATGCGGCGGCTGCATACGCTTGATC 4559  
LUCH CTCCTGCCGAGAAAGTATCCATCATGGCTGATGCAATGCGGCGGCTGCATACGCTTGATC 4619  
\*\*\*\*\*

YJ CGGCTACCTGCCATTGACCACCAAGCGAAACATCGCATCGAGCGAGCACGTACTCGGA 4619  
LUCH CGGCTACCTGCCATTGACCACCAAGCGAAACATCGCATCGAGCGAGCACGTACTCGGA 4679  
\*\*\*\*\*

YJ TGGGAGCCGGTCTTGTGTCATCAGGATGATCTGGACGAAGAGCATCAGGGGCTCGCGCCAG 4679  
LUCH TGGGAGCCGGTCTTGTGTCATCAGGATGATCTGGACGAAGAGCATCAGGGGCTCGCGCCAG 4739  
\*\*\*\*\*

YJ CCGAACTGTTGCCAGGCTCAAGGCGCGCATGCCGACGCGGAGGATCTCGTCGTGACAC 4739  
LUCH CCGAACTGTTGCCAGGCTCAAGGCGCGCATGCCGACGCGGAGGATCTCGTCGTGACAC 4799  
\*\*\*\*\*

YJ ATGGCGATGCCTGCTTGCCGAATATCATGGTGGAAAATGGCCGCTTTTCTGGATTCATCG 4799  
LUCH ATGGCGATGCCTGCTTGCCGAATATCATGGTGGAAAATGGCCGCTTTTCTGGATTCATCG 4859  
\*\*\*\*\*

YJ ACTGTGGCCGGCTGGGTGTGGCGGACCGCTATCAGGACATAGCGTTGGGTACCCGTGATA 4859  
LUCH ACTGTGGCCGGCTGGGTGTGGCGGACCGCTATCAGGACATAGCGTTGGGTACCCGTGATA 4919  
\*\*\*\*\*

YJ TTGCTGAAGAGCTTGGCGGCGAATGGGCTGACCGCTTCTCGTGCTTTACGGTATCGCCG 4919  
LUCH TTGCTGAAGAGCTTGGCGGCGAATGGGCTGACCGCTTCTCGTGCTTTACGGTATCGCCG 4979  
\*\*\*\*\*

YJ CTCCCGATTGCGAGCGCATCGCCTTCTATCGCCTTCTTGACGAGTTCTTCTGAGCGGGAC 4979  
LUCH CTCCCGATTGCGAGCGCATCGCCTTCTATCGCCTTCTTGACGAGTTCTTCTGAGCGGGAC 5039  
\*\*\*\*\*

YJ TCTGGGGTTCGGATCGATCCTCTAGCTAGAGTCGATCGACATCGAGTTTCTCCATAATAA 5039  
LUCH TCTGGGGTTCGGATCGATCCTCTAGCTAGAGTCGATCGACATCGAGTTTCTCCATAATAA 5099  
\*\*\*\*\*

YJ TGTGTGAGTAGTCCCAGATAAGGGAATTAGGGTTCTTATAGGGTTTCGCTCACGTGTTG 5099  
LUCH TGTGTGAGTAGTCCCAGATAAGGGAATTAGGGTTCTTATAGGGTTTCGCTCACGTGTTG 5159  
\*\*\*\*\*

YJ AGCATATAAGAAACCCCTTAGTATGTATTTGTATTTGTAATACTTCTATCAATAAAATT 5159  
LUCH AGCATATAAGAAACCCCTTAGTATGTATTTGTATTTGTAATACTTCTATCAATAAAATT 5219  
\*\*\*\*\*

YJ TCTAATTCCTAAAACCAAAATCCAGTACTAAAATCCAGATCACCTAAAGTCCCTATAGAT 5219  
LUCH TCTAATTCCTAAAACCAAAATCCAGTACTAAAATCCAGATCACCTAAAGTCCCTATAGAT 5279  
\*\*\*\*\*

YJ CCCCCGAATTAATTCGGCGTTAATTCAGTACATTAATAACGTCGCAATGTGTTATTAAG 5279  
LUCH CCCCCGAATTAATTCGGCGTTAATTCAGTACATTAATAACGTCGCAATGTGTTATTAAG 5339  
\*\*\*\*\*

YJ TTGTCTAAG 5288  
LUCH TTGTCTAAG 5348  
\*\*\*\*\*
