# Supplementary material for: The MBD7 complex promotes expression of methylated transgenes without significantly altering their methylation status
Source: eLife journal article supplement (doi:10.7554/elife.19893), 2017-04-28
Supplement: supp [file elife_poa_e19893_Supplementary_File_1.xlsx]

## Sheet: Table S1A YJ_LUCH mC Mapping 
Table S1A MethylC-seq Mapping Information
Bsmap*
name	tissue	total # of aligned reads (% of total reads)	Level of cross reactivity between LUC transgene (YJ and LUCH) and T-DNAs**
LUCH_r2	seedlings	6769 (0.0094%)	LUCH present--no other T-DNAs present
LUCH_lil-2_r2	seedlings	7903 (0.011%)	LUCH present--no other T-DNAs present ***
Ler_r6	seedlings	63 (4.7e-05%)	No YJ transgene; very few mapping reads
Ler_mbd7-5_r6	seedlings	367 (0.00024%)	No YJ transgene; cross reactivity between YJ and the mbd7-5 allele T-DNA at the NTPII gene (See Fig. 4C)
Ler_YJ_r6	seedlings	3610 (0.0029%)	YJ present--no other T-DNAs present
Ler_YJ_mbd7-5_r6	seedlings	3392 (0.0028%)	YJ present; mbd7-5 T-DNA cross reactivity at the NTPII gene only
Ler_YJ_mbd7-5 + MBD73xHA_r6	seedlings	3636 (0.003%)	YJ present; mbd7-5 T-DNA cross reactivity at the NTPII gene only; MBD7-3xHA transgene cross reactivity at the Right boarder
YJ_r1	seedlings	2602 (0.0024%)	YJ present--no other T-DNAs present
YJ_lil-1_r1	seedlings	2749 (0.0025%)	YJ present--no other T-DNAs present
YJ_r2	seedlings	452 (0.0017%)	YJ present--no other T-DNAs present
YJ_lil-1_r2	seedlings	565 (0.0022%)	YJ present--no other T-DNAs present
YJ_r5	seedlings	1909 (0.0033%)	YJ present--no other T-DNAs present
YJ_lil-1_r5	seedlings	1114 (0.0017%)	YJ present--no other T-DNAs present
YJ_r7	seedlings	2464 (0.0027%)	YJ present--no other T-DNAs present
YJ_lil-1_r7	seedlings	1262 (0.002%)	YJ present--no other T-DNAs present
YJ_lil-1_9xMyc_1LIL_r7	seedlings	3874 (0.0055%)	YJ present; cross reaction with the 9xMycLIL transgene at Left boarder and upstream of NPTII promoter
YJ_lil-1_9xMyc_2LIL_r7	seedlings	4498 (0.0066%)	YJ present; cross reaction with the 9xMycLIL transgene at Left boarder and upstream of NPTII promoter
mbd7-3_r6	flowers	872 (0.00072%)	No YJ transgene; cross reactivity across the 35S promoter as well as other regions of the YJ transgene presumably from the T-DNA used to generate this mutant
mbd7-4_r6	flowers	2237 (0.002%)	No YJ transgene; cross reactivity across the 35S promoter as well as other regions of the YJ transgene presumably from the T-DNA used to generate this mutant
nrpe1-11_B	seedlings	1457 (0.0047%)	No YJ transgene; cross reactivity across the 35S promoter as well as other regions of the YJ transgene presumably from the T-DNA used to generate this mutant
rdd_r5	seedlings	5324 (0.017%)	No YJ transgene; cross reactivity across the 35S promoter as well as other regions of the YJ transgene presumably from the T-DNA used to generate this mutant
*Bsmap options: -w 2 -n 0 -v 2. This allows multimapping reads
** Cross reactivty is defined as reads mapping to the YJ or LUCH transgenes that likely arose from other transgenes present in the genome due to the presents of T-DNA insertaional mutants and/or transgenes harboring tagged version of the LIL or MBD7 genes.
***The T-DNA used for the mutagenesis of the LUCH line was removed in the LUCH lil-2 background by backcrossing.
genomewide Methyl-C seq data vaild for calculating metyation across the entire LUC reporter transgene
genomewide Methyl-C seq data vaild for calculating metyation across most of the LUC reporter, including the 35S promoters
genomewide Methyl-C seq NOT valid for calculating methyaltion across the LUC reporters (see tradtional bisulfite sequencing data in Fig. 5)
Table S1A MethylC-seq Mapping Information
BSseeker2*
name	tissue	total # of uniquely aligned reads (% of total reads)	Level of cross reactivity between LUC transgene (YJ and LUCH) and T-DNAs**
LUCH_r2	seedlings	4938 (0.0069%)	YJ present--no other T-DNAs present
YJ_r1	seedlings	1861 (0.0018%)	LUCH present--no other T-DNAs present
*BSseeker2 options: -m 2. This included only uniquely mapping reads.

## Sheet: Table S1B YJ_LUCH mC Coverage
Table S1B Coverage					Table S1B Coverage
Bsmap No filter (coverage >=5)					BSseeker2 No filter (coverage >=5)
name	valid mappings	covered C's	transgene fold coverage*		name	valid mappings	covered C's	transgene fold coverage*
LUCH_r2	6768	2532	79.9041		LUCH_r2
LUCH_lil-2_r2	7895	2538	90.5543		YJ_r1
Ler_r6	63	643	0.607602
Ler_mbd7-5_r6**	367	855	N/A
Ler_YJ_r6	3610	2497	34.8166
Ler_YJ_mbd7-5_r6**	3391	2499	N/A
Ler_YJ_mbd7-5 + MBD73xHA_r6**	3633	2497	N/A
YJ_r1	2601	2506	25.0949
YJ_lil-1_r1	2747	2504	26.5127
YJ_r2	452	2241	8.63313
YJ_lil-1_r2	565	2368	10.7914
YJ_r5	1909	2451	24.2831
YJ_lil-1_r5	1114	2441	13.9304
YJ_r7	2464	2492	23.764
YJ_lil-1_r7	1261	2469	12.1713
YJ_lil-1_9xMyc_1LIL_r7**	3873	2479	N/A
YJ_lil-1_9xMyc_2LIL_r7**	4495	2478	N/A
* Trangene fold coverage was calculted using bedtools genomecov function as follows: genomecov -ibam file.bam -g Transgene_genome | awk '{ if ($1=="genome") { sum += $2*$3; n++ } } END { if (n > 0) print sum /5288; }'
** genotypes that show cross reactivity with the YJ transgene outside of the 35S promoter regions as detailed in Table S1A. Due to higher coverage of the regions in common between the YJ transgene and either the T-DNA mutant or the LIL or MBD7 transgenes an accurate value for transgene coverage cannot be calculated and thus is represented by and "N/A" value.

## Sheet: Table S1C YJ_LUCH smRNA
Table S2. Mapping and coverage of small RNA data at YJ and LUCH transgenes
Sample	LUCH	YJ
Raw Readsa	25319882	23992584
Adapter-Trimmed Readsb	19500806	17104029
Mapped Reads (Genome)c	2955939	1741701
Mapped Reads (Transgene)d	21,486 (16,967)	1,723 (1,251)
21 nt	5,565 (4,533)	274 (113)
22 nt	10,907 (9,183)	146 (98)
23 nt	756 (365)	153 (90)
24 nt	3,732 (2,515)	277 (103)
a. Total raw reads
b. Number of reads containing trimmed 3' adapter sequences. Reads < 18nt after adapter trimming were discarded.
c. Number of reads mapped to the TAIR10 genome perfectly allowing for multiple mapping (-v 0 -m 1000). Reads corresponding to rRNAs, tRNAs, snoRNAs, and snRNAs were removed prior to mapping against the genome.
d. Number of reads mapped to the transgene perfectly allowing for multiple mapping (-v 0 -m 1000) or unique mapping (-v 0 -m 1). Number of uniquely mapped reads are indicated in parentheses. Number of reads mapped to the transgene sorted by read size.

## Sheet: Table S1D YJ_LUCH suppDataList
Table S3: List of Supplemental Materials for LUC Reporter Genomics
Folder/File Name	File description
LUC_transgenes.genome	Genome file for loading into the IGV genome browser. LUC_Transgene6.fa=YJ; LUC_Transgene7.fa=LUCH
TransgeneWig	MethylCseq wiggle format genome browser tracks showing DNA methylation levels at the YJ and LUCH transgenes (coverage >=5).
YJ_tradBS_WigTracks	Traditional BS sequencing wiggle format genome browser tracks showing DNA methylation levels at the YJ and LUCH transgenes (coverage 17-24x).

## Sheet: Table S1E mC TAIR10
Table S4 Tair10 genome Mapping and Coverage Information
Bsseeker2*
name**	tissue	total # of uniquely aligned reads# (% of total reads)	Total bases of uniquely mapped reads	fold coverage (uniquely mapped reads/119,000,000)	%CG	%CHG	%CHH	Number of raw reads	Number of bases in total	Number of reads rejected because of multiple hits	CG Conversion rate#	CHG Conversion rate#	CHH Conversion rate#
YJ_r1	seedlings	89862299 (84.58%)	4582977249	38.5124	0.2466	0.07672	0.02222	106250279	5418764229	9393	0.9758	0.9757	0.9782
YJ_lil-1_r1	seedlings	93821901 (85.26%)	4784916951	40.2094	0.25275	0.07655	0.02223	110047743	5612434893	1703	0.9749	0.9748	0.9772
YJ_mbd7-4_r1	seedlings	100794112 (84.87%)	5140499712	43.1975	0.25651	0.07849	0.02314	118758688	6056693088	27544	0.9756	0.9758	0.978
YJ_mbd7-3_r1	seedlings	99427025 (84.87%)	5070778275	42.6116	0.25724	0.07841	0.02255	117158918	5975104818	5703	0.9749	0.975	0.9779
LUCH_r2	seedlings	60341321 (83.87%)	4274080171	35.9166	0.27534	0.0945	0.02923	71945125	5123549225	34452	0.9748	0.9745	0.9735
LUCH_lil-2_r2	seedlings	58561317 (83.41%)	4095876667	34.4191	0.30429	0.1098	0.03455	70206405	4933413555	7120	0.9748	0.9749	0.9741
YJ_r2	seedlings	22736296 (83.64%)	2296365896	19.2972	0.28036	0.09875	0.02955	27183175	2745500675	5777	0.9805	0.9798	0.9788
YJ_lil-1_r2	seedlings	21549136 (82.50%)	2176462736	18.2896	0.27968	0.09236	0.02888	26119309	2638050209	4450	0.9797	0.979	0.977
YJ_r5	seedlings	48734228 (83.38%)	3434959828	28.8652	0.29259	0.10678	0.03391	58449448	4158767848	12682	0.983	0.9833	0.9824
YJ_lil-1_r5	seedlings	53478725 (83.36%)	3800739075	31.939	0.29229	0.10246	0.03134	64156542	4604035842	4454	0.9827	0.9828	0.982
Col_B	seedlings	20856662 (84.93%)	2106522862	17.7019	0.28635	0.09808	0.03019	24558772	2480435972	15957	0.9816	0.9809	0.9782
Col_r1_r2	seedlings	75411838 (85.02%)	3846003738	32.3194	0.24333	0.07412	0.01941	88694406	4523414706	24286	0.9747	0.9746	0.977
Col_r5	seedlings	73227506 (82.07%)	4895142606	41.1357	0.33974	0.13449	0.04399	89221343	5986830943	6119	0.9793	0.9792	0.9787
rdd_r5	seedlings	76234121 (81.97%)	5146171621	43.2451	0.38769	0.16194	0.04637	93007817	6313257717	236	0.975	0.9748	0.9745
Ler_r6	seedlings	98199816 (72.63%)	5008190616	42.0856	0.21277	0.06613	0.02141	135200444	6895222644	7739	0.978	0.9781	0.9803
Ler_mbd7-5_r6	seedlings	108072710 (72.06%)	5511708210	46.3169	0.21665	0.06587	0.02237	149972896	7648617696	42071	0.9793	0.9793	0.9813
Ler_YJ_r6	seedlings	92238123 (73.73%)	4704144273	39.5306	0.20117	0.05626	0.01825	125105779	6380394729	4466	0.972	0.972	0.9725
Ler_YJ_mbd7-5_r6	seedlings	89565362 (73.45%)	4567833462	38.3852	0.20528	0.0618	0.01927	121937546	6218814846	39938	0.9736	0.9736	0.9746
Ler_YJ_mbd7-5 + MBD73xHA_r6	seedlings	88296102 (73.61%)	4503101202	37.8412	0.20143	0.05966	0.01915	119956536	6117783336	32999	0.9746	0.9746	0.9752
YJ_r7	seedlings	75928271 (83.60%)	3872341821	32.5407	0.24316	0.08138	0.02358	90818160	4631726160	27830	0.9799	0.9798	0.9825
YJ_lil-1_r7	seedlings	52761580 (84.09%)	2690840580	22.6121	0.26457	0.09427	0.02859	62745303	3200010453	26991	0.9806	0.9805	0.9826
YJ_lil-1_9xMyc_1LIL_r7	seedlings	58768805 (84.09%)	2997209055	25.1866	0.24464	0.08282	0.02441	69890151	3564397701	31180	0.9807	0.9803	0.9825
YJ_lil-1_9xMyc_2LIL_r7	seedlings	56985097 (83.97%)	2906239947	24.4222	0.25295	0.08596	0.02551	67862205	3460972455	30206	0.9808	0.9807	0.9831
*BSseeker options: bs_seeker2-align.py default parameters inaddition to -m 2 (two mismatched allowed) --aligner=bowtie (alignment using bowtie)
** samples with the same _r# were grown and processed together to generate MethylC-seq libraries.
# Converstion rates were calculated by mapping to the Pt genome and subtracting the % methylation from 1 (i.e. 1- % Pt methylation)

## Sheet: Table S1F TAIR10 suppDataList
Table S5: List of supplemental genomics data for the genome-wide analyses (Tair10)
Folder/File Name	File description
Cov4_nofilter_Wig	MethylCseq wiggle format genome browser tracks showing DNA methylation levels (coverage >=4)
DMRs	coordinates of DMRs identified in each mutant, including replicate datasets
