# Supplementary material for: The MBD7 complex promotes expression of methylated transgenes without significantly altering their methylation status
Source: eLife journal article supplement (doi:10.7554/elife.19893), 2017-04-28
Supplement: supp [file elife_poa_e19893_Supplementary_File_2.xlsx]

## Sheet: Table S2A DMR counts
Table S6: Hyper and Hypo DMRs in the CG, CHG and CHH contexts
hyperDMRs*			hypoDMRs*			samples
CG	CHG	CHH	CG	CHG	CHH	LIL and MBD7
4350	496	590	2339	62	614	YJ_r1_vs_YJ_lil-1_r1
2388	174	3797	1133	28	1584	YJ_r2_vs_YJ_lil-1_r2
2246	322	1655	904	167	4014	YJ_r5_Cat_vs_YJ_lil-1_r5
2734	455	6354	2187	170	1342	LUCH_r2_vs_LUCH_lil-2_r2
2332	252	489	1580	115	600	YJ_r1_vs_YJ_mbd7-3_r1
2827	280	621	1718	94	492	YJ_r1_vs_YJ_mbd7-4_r1
						Demethylases
13579	9115	13434	2111	84	2965	Col_B_vs_rdd_r5_Cat
15788	10791	11466	2722	343	7827	Col_r5_Cat_vs_rdd_r5_Cat
18402	13223	21816	2740	91	1097	Col_r1_r2_vs_rdd_r5_Cat
						Ler
3316	294	576	4927	864	835	Ler_r6_vs_Ler_mbd7-5_r6
1443	171	533	1315	120	373	Ler_YJ_r6_vs_Ler_YJ_mbd7-5_r6
2247	98	628	2894	259	367	Ler_YJ_r6_vs_Ler_YJ_mbd7-5+MBD73xHA_r6
330	20	455	644	121	351	Ler_YJ_mbd7-5_r6_vs_Ler_YJ_mbd7-5+MBD73xHA_r6
						LIL complementation
2929	390	2229	1338	41	420	YJ_r7_vs_YJ_lil-1_r7
2773	278	1297	2156	108	737	YJ_r7_vs_YJ_lil-1_9xMyc_1LIL_r7
3231	274	1172	1904	76	563	YJ_r7_vs_YJ_lil-1_9xMyc_2LIL_r7
158	16	633	614	78	1675	YJ_lil-1_r7_vs_YJ_lil-1_9xMyc_1LIL_r7
182	5	521	268	27	1270	YJ_lil-1_r7_vs_YJ_lil-1_9xMyc_2LIL_r7
*hyper and hypoDMRs are relative to control samples (e.g. for a hyperDMR, methylation is higher in YJ lil-1_r1 than in YJ_r1 )

## Sheet: Table S2B DMR overlaps_2way
Table S7: Direct DMR overlaps in the various lil and mbd7 datasets
(YJ_r1 vs YJ_lil-1_r1) vs (YJ_r2 vs YJ_lil-1_r2)				(YJ_r2 vs YJ_lil-1_r2) vs (YJ_r5 vs YJ_lil-1_r5)				(LUCH_r2 vs LUCH_lil-2_r2) vs (YJ_r5 vs YJ_lil-1_r5)				(YJ_r5 vs YJ_lil-1_r5) vs (YJ_r1 vs YJ_mbd7-3_r1)				(YJ_r1 vs YJ_mbd7-4_r1) vs (YJ_r1 vs YJ_mbd7-3_r1)
hyper	CG	1667		hyper	CG	619		hyper	CG	111		hyper	CG	203		hyper	CG	706
	CHG	119			CHG	62			CHG	76			CHG	62			CHG	101
	CHH	126			CHH	127			CHH	156			CHH	45			CHH	104
hypo	CG	822		hypo	CG	201		hypo	CG	24		hypo	CG	56		hypo	CG	372
	CHG	10			CHG	2			CHG	3			CHG	3			CHG	22
	CHH	28			CHH	85			CHH	71			CHH	56			CHH	119
(YJ_r1 vs YJ_lil-1_r1) vs (YJ_r5 vs YJ_lil-1_r5)				(YJ_r2 vs YJ_lil-1_r2) vs (LUCH_r2 vs LUCH_lil-2_r2)				(LUCH_r2 vs LUCH_lil-2_r2) vs (YJ_r1 vs YJ_mbd7-3_r1)				(YJ_r5 vs YJ_lil-1_r5) vs (YJ_r1 vs YJ_mbd7-4_r1)
hyper	CG	932		hyper	CG	130		hyper	CG	125		hyper	CG	167
	CHG	146			CHG	44			CHG	56			CHG	66
	CHH	87			CHH	426			CHH	74			CHH	48
hypo	CG	334		hypo	CG	37		hypo	CG	63		hypo	CG	53
	CHG	7			CHG	4			CHG	4			CHG	1
	CHH	65			CHH	33			CHH	18			CHH	42
(YJ_r1 vs YJ_lil-1_r1) vs (LUCH_r2 vs LUCH_lil-2_r2)				(YJ_r2 vs YJ_lil-1_r2) vs (YJ_r1 vs YJ_mbd7-3_r1)				(LUCH_r2 vs LUCH_lil-2_r2) vs (YJ_r1 vs YJ_mbd7-4_r1)
hyper	CG	225		hyper	CG	376		hyper	CG	171
	CHG	101			CHG	46			CHG	76
	CHH	93			CHH	72			CHH	79
hypo	CG	78		hypo	CG	151		hypo	CG	82
	CHG	7			CHG	1			CHG	4
	CHH	17			CHH	16			CHH	13
(YJ_r1 vs YJ_lil-1_r1) vs (YJ_r1 vs YJ_mbd7-3_r1)				(YJ_r2 vs YJ_lil-1_r2) vs (YJ_r1 vs YJ_mbd7-4_r1)
hyper	CG	786		hyper	CG	412
	CHG	143			CHG	55
	CHH	95			CHH	81
hypo	CG	354		hypo	CG	188
	CHG	8			CHG	2
	CHH	128			CHH	22
(YJ_r1 vs YJ_lil-1_r1) vs (YJ_r1 vs YJ_mbd7-4_r1)
hyper	CG	906
	CHG	151
	CHH	106
hypo	CG	435
	CHG	12
	CHH	96

## Sheet: Table S2C DMR overlaps_3way
Table S7: Direct DMR overlaps in the various lil and mbd7 datasets
(YJ_r1 vs YJ_lil-1_r1) vs (YJ_r2 vs YJ_lil-1_r2) vs (YJ_r5 vs YJ_lil-1_r5)				(YJ_r1 vs YJ_lil-1_r1) vs (YJ_r5 vs YJ_lil-1_r5) vs (LUCH_r2 vs LUCH_lil-2_r2)				(YJ_r1 vs YJ_lil-1_r1) vs (LUCH_r2 vs LUCH_lil-2_r2) vs (YJ_r1 vs YJ_mbd7-3_r1)				(YJ_r1 vs YJ_lil-1_r1) vs (YJ_r1 vs YJ_mbd7-4_r1) vs (YJ_r1 vs YJ_mbd7-3_r1)				(YJ_r2 vs YJ_lil-1_r2) vs (YJ_r5 vs YJ_lil-1_r5) vs (LUCH_r2 vs LUCH_lil-2_r2)				(YJ_r2 vs YJ_lil-1_r2) vs (LUCH_r2 vs LUCH_lil-2_r2) vs (YJ_r1 vs YJ_mbd7-3_r1)				(YJ_r2 vs YJ_lil-1_r2) vs (YJ_r1 vs YJ_mbd7-4_r1) vs (YJ_r1 vs YJ_mbd7-3_r1)				(YJ_r5 vs YJ_lil-1_r5) vs (LUCH_r2 vs LUCH_lil-2_r2) vs (YJ_r1 vs YJ_mbd7-3_r1)				(YJ_r5 vs YJ_lil-1_r5) vs (YJ_r1 vs YJ_mbd7-4_r1) vs (YJ_r1 vs YJ_mbd7-3_r1)				(LUCH_r2 vs LUCH_lil-2_r2) vs (YJ_r1 vs YJ_mbd7-4_r1) vs (YJ_r1 vs YJ_mbd7-3_r1)				(Col_B vs rdd_r5) vs (Col_r1_r2 vs rdd_r5) vs (Col_r5 vs rdd_r5)
hyper	CG	525		hyper	CG	66		hyper	CG	69		hyper	CG	421		hyper	CG	50		hyper	CG	37		hyper	CG	192		hyper	CG	31		hyper	CG	90		hyper	CG	54		hyper	CG	10680
	CHG	55			CHG	47			CHG	45			CHG	82			CHG	26			CHG	19			CHG	32			CHG	30			CHG	43			CHG	34			CHG	7016
	CHH	44			CHH	13			CHH	29			CHH	41			CHH	25			CHH	19			CHH	27			CHH	15			CHH	23			CHH	26			CHH	7948
hypo	CG	178		hypo	CG	5		hypo	CG	15		hypo	CG	187		hypo	CG	4		hypo	CG	10		hypo	CG	90		hypo	CG	3		hypo	CG	29		hypo	CG	12		hypo	CG	988
	CHG	2			CHG	1			CHG	0			CHG	4			CHG	1			CHG	0			CHG	0			CHG	0			CHG	1			CHG	0			CHG	30
	CHH	3			CHH	3			CHH	4			CHH	41			CHH	7			CHH	0			CHH	4			CHH	3			CHH	8			CHH	2			CHH	428
(YJ_r1 vs YJ_lil-1_r1) vs (YJ_r2 vs YJ_lil-1_r2) vs (LUCH_r2 vs LUCH_lil-2_r2)				(YJ_r1 vs YJ_lil-1_r1) vs (YJ_r5 vs YJ_lil-1_r5) vs (YJ_r1 vs YJ_mbd7-3_r1)				(YJ_r1 vs YJ_lil-1_r1) vs (LUCH_r2 vs LUCH_lil-2_r2) vs (YJ_r1 vs YJ_mbd7-4_r1)								(YJ_r2 vs YJ_lil-1_r2) vs (YJ_r5 vs YJ_lil-1_r5) vs (YJ_r1 vs YJ_mbd7-3_r1)				(YJ_r2 vs YJ_lil-1_r2) vs (LUCH_r2 vs LUCH_lil-2_r2) vs (YJ_r1 vs YJ_mbd7-4_r1)								(YJ_r5 vs YJ_lil-1_r5) vs (LUCH_r2 vs LUCH_lil-2_r2) vs (YJ_r1 vs YJ_mbd7-4_r1)
hyper	CG	98		hyper	CG	169		hyper	CG	78						hyper	CG	114		hyper	CG	37						hyper	CG	27
	CHG	36			CHG	54			CHG	59							CHG	24			CHG	29							CHG	40
	CHH	20			CHH	20			CHH	27							CHH	18			CHH	17							CHH	16
hypo	CG	30		hypo	CG	52		hypo	CG	20						hypo	CG	33		hypo	CG	13						hypo	CG	1
	CHG	3			CHG	1			CHG	3							CHG	0			CHG	2							CHG	0
	CHH	3			CHH	19			CHH	2							CHH	3			CHH	2							CHH	2
(YJ_r1 vs YJ_lil-1_r1) vs (YJ_r2 vs YJ_lil-1_r2) vs (YJ_r1 vs YJ_mbd7-3_r1)				(YJ_r1 vs YJ_lil-1_r1) vs (YJ_r5 vs YJ_lil-1_r5) vs (YJ_r1 vs YJ_mbd7-4_r1)												(YJ_r2 vs YJ_lil-1_r2) vs (YJ_r5 vs YJ_lil-1_r5) vs (YJ_r1 vs YJ_mbd7-4_r1)
hyper	CG	328		hyper	CG	143										hyper	CG	91
	CHG	43			CHG	56											CHG	25
	CHH	32			CHH	29											CHH	19
hypo	CG	138		hypo	CG	44										hypo	CG	30
	CHG	1			CHG	0											CHG	0
	CHH	3			CHH	10											CHH	4
(YJ_r1 vs YJ_lil-1_r1) vs (YJ_r2 vs YJ_lil-1_r2) vs (YJ_r1 vs YJ_mbd7-4_r1)
hyper	CG	374
	CHG	49
	CHH	32
hypo	CG	171
	CHG	2
	CHH	6

## Sheet: Table S2D DMR overlaps_4way
Table S7: Direct DMR overlaps in the various lil and mbd7 datasets
(YJ_r1 vs YJ_lil-1_r1) vs (YJ_r2 vs YJ_lil-1_r2) vs (YJ_r5 vs YJ_lil-1_r5)vs (LUCH_r2 vs LUCH_lil-2_r2)				(YJ_r1 vs YJ_lil-1_r1) vs (YJ_r2 vs YJ_lil-1_r2) vs (LUCH_r2 vs LUCH_lil-2_r2) vs (YJ_r1 vs YJ_mbd7-3_r1)				(YJ_r1 vs YJ_lil-1_r1) vs (YJ_r2 vs YJ_lil-1_r2) vs (YJ_r1 vs YJ_mbd7-4_r1) vs (YJ_r1 vs YJ_mbd7-3_r1)				(YJ_r1 vs YJ_lil-1_r1) vs (YJ_r5 vs YJ_lil-1_r5) vs (LUCH_r2 vs LUCH_lil-2_r2) vs (YJ_r1 vs YJ_mbd7-3_r1)				(YJ_r1 vs YJ_lil-1_r1) vs (YJ_r5 vs YJ_lil-1_r5) vs (YJ_r1 vs YJ_mbd7-4_r1) vs (YJ_r1 vs YJ_mbd7-3_r1)				(YJ_r1 vs YJ_lil-1_r1) vs (LUCH_r2 vs LUCH_lil-2_r2) vs (YJ_r1 vs YJ_mbd7-4_r1) vs (YJ_r1 vs YJ_mbd7-3_r1)				(YJ_r2 vs YJ_lil-1_r2) vs (YJ_r5 vs YJ_lil-1_r5) vs (LUCH_r2 vs LUCH_lil-2_r2) vs (YJ_r1 vs YJ_mbd7-3_r1)				(YJ_r2 vs YJ_lil-1_r2) vs (YJ_r5 vs YJ_lil-1_r5) vs (YJ_r1 vs YJ_mbd7-4_r1) vs (YJ_r1 vs YJ_mbd7-3_r1)				(YJ_r2 vs YJ_lil-1_r2) vs (LUCH_r2 vs LUCH_lil-2_r2) vs (YJ_r1 vs YJ_mbd7-4_r1) vs (YJ_r1 vs YJ_mbd7-3_r1)				(YJ_r5 vs YJ_lil-1_r5) vs (LUCH_r2 vs LUCH_lil-2_r2) vs (YJ_r1 vs YJ_mbd7-4_r1) vs (YJ_r1 vs YJ_mbd7-3_r1)
hyper	CG	46		hyper	CG	35		hyper	CG	179		hyper	CG	29		hyper	CG	85		hyper	CG	37		hyper	CG	22		hyper	CG	56		hyper	CG	18		hyper	CG	17
	CHG	22			CHG	18			CHG	31			CHG	26			CHG	41			CHG	31			CHG	16			CHG	19			CHG	17			CHG	26
	CHH	7			CHH	10			CHH	18			CHH	9			CHH	17			CHH	19			CHH	9			CHH	10			CHH	11			CHH	11
hypo	CG	3		hypo	CG	10		hypo	CG	87		hypo	CG	2		hypo	CG	27		hypo	CG	8		hypo	CG	2		hypo	CG	19		hypo	CG	6		hypo	CG	1
	CHG	1			CHG	0			CHG	0			CHG	0			CHG	0			CHG	0			CHG	0			CHG	0			CHG	0			CHG	0
	CHH	1			CHH	0			CHH	1			CHH	1			CHH	3			CHH	0			CHH	0			CHH	0			CHH	0			CHH	0
(YJ_r1 vs YJ_lil-1_r1) vs (YJ_r2 vs YJ_lil-1_r2) vs (YJ_r5 vs YJ_lil-1_r5)vs (YJ_r1 vs YJ_mbd7-3_r1)				(YJ_r1 vs YJ_lil-1_r1) vs (YJ_r2 vs YJ_lil-1_r2) vs (LUCH_r2 vs LUCH_lil-2_r2) vs (YJ_r1 vs YJ_mbd7-4_r1)								(YJ_r1 vs YJ_lil-1_r1) vs (YJ_r5 vs YJ_lil-1_r5) vs (LUCH_r2 vs LUCH_lil-2_r2) vs (YJ_r1 vs YJ_mbd7-4_r1)												(YJ_r2 vs YJ_lil-1_r2) vs (YJ_r5 vs YJ_lil-1_r5) vs (LUCH_r2 vs LUCH_lil-2_r2) vs (YJ_r1 vs YJ_mbd7-4_r1)
hyper	CG	105		hyper	CG	37						hyper	CG	22										hyper	CG	15
	CHG	23			CHG	29							CHG	36											CHG	20
	CHH	10			CHH	10							CHH	12											CHH	7
hypo	CG	33		hypo	CG	12						hypo	CG	1										hypo	CG	1
	CHG	0			CHG	2							CHG	0											CHG	0
	CHH	0			CHH	1							CHH	1											CHH	2
(YJ_r1 vs YJ_lil-1_r1) vs (YJ_r2 vs YJ_lil-1_r2) vs (YJ_r5 vs YJ_lil-1_r5)vs (YJ_r1 vs YJ_mbd7-4_r1)
hyper	CG	87
	CHG	25
	CHH	14
hypo	CG	29
	CHG	0
	CHH	2

## Sheet: Table S2E DMR overlaps_5way
Table S7: Direct DMR overlaps in the various lil and mbd7 datasets
(YJ_r1 vs YJ_lil-1_r1) vs (YJ_r2 vs YJ_lil-1_r2) vs (LUCH_r2 vs LUCH_lil-2_r2) vs (YJ_r1 vs YJ_mbd7-4_r1) vs (YJ_r1 vs YJ_mbd7-3_r1)				(YJ_r1 vs YJ_lil-1_r1) vs (YJ_r2 vs YJ_lil-1_r2) vs (YJ_r5 vs YJ_lil-1_r5) vs (LUCH_r2 vs LUCH_lil-2_r2) vs (YJ_r1 vs YJ_mbd7-3_r1)				(YJ_r1 vs YJ_lil-1_r1) vs (YJ_r2 vs YJ_lil-1_r2) vs (YJ_r5 vs YJ_lil-1_r5) vs (YJ_r1 vs YJ_mbd7-4_r1) vs (YJ_r1 vs YJ_mbd7-3_r1)
hyper	CG	18		hyper	CG	22		hyper	CG	54
	CHG	17			CHG	15			CHG	19
	CHH	9			CHH	6			CHH	8
hypo	CG	6		hypo	CG	2		hypo	CG	19
	CHG	0			CHG	0			CHG	0
	CHH	0			CHH	0			CHH	0
(YJ_r1 vs YJ_lil-1_r1) vs (YJ_r5 vs YJ_lil-1_r5) vs (LUCH_r2 vs LUCH_lil-2_r2) vs (YJ_r1 vs YJ_mbd7-4_r1) vs (YJ_r1 vs YJ_mbd7-3_r1)				(YJ_r1 vs YJ_lil-1_r1) vs (YJ_r2 vs YJ_lil-1_r2) vs (YJ_r5 vs YJ_lil-1_r5) vs (LUCH_r2 vs LUCH_lil-2_r2) vs (YJ_r1 vs YJ_mbd7-4_r1)
hyper	CG	16		hyper	CG	15
	CHG	25			CHG	20
	CHH	9			CHH	6
hypo	CG	1		hypo	CG	1
	CHG	0			CHG	0
	CHH	0			CHH	1
(YJ_r2 vs YJ_lil-1_r2) vs (YJ_r5 vs YJ_lil-1_r5) vs (LUCH_r2 vs LUCH_lil-2_r2) vs (YJ_r1 vs YJ_mbd7-4_r1) vs (YJ_r1 vs YJ_mbd7-3_r1)
hyper	CG	12
	CHG	15
	CHH	7
hypo	CG	1
	CHG	0
	CHH	0

## Sheet: Table S2F DMR overlaps_6way
Table S7: Direct DMR overlaps in the various lil and mbd7 datasets
(YJ_r1 vs YJ_lil-1_r1) vs (YJ_r2 vs YJ_lil-1_r2) vs (YJ_r5 vs YJ_lil-1_r5) vs (LUCH_r2 vs LUCH_lil-2_r2) vs (YJ_r1 vs YJ_mbd7-4_r1) vs (YJ_r1 vs YJ_mbd7-3_r1)
hyper	CG	12
	CHG	15
	CHH	6
hypo	CG	1
	CHG	0
	CHH	0

## Sheet: Table S2G 6way_hyperCG_DMR_List
Chr1	23237600	23237700
Chr2	17499500	17499600
Chr3	11720800	11720900
Chr3	22747900	22748000
Chr3	22748000	22748100
Chr3	22748100	22748200
Chr5	10358000	10358100
Chr5	15985400	15985500
Chr5	18142300	18142400
Chr5	19830200	19830300
Chr5	24928400	24928500
Chr5	25870400	25870500

## Sheet: TableS2H 6way_hyperCHG_DMR_List
Chr1	12844600	12844700
Chr1	20475500	20475600
Chr1	23237900	23238000
Chr2	10658600	10658700
Chr2	17500300	17500400
Chr2	17500400	17500500
Chr3	28900	29000
Chr3	1560500	1560600
Chr3	1963800	1963900
Chr3	10395500	10395600
Chr3	10395700	10395800
Chr4	9513100	9513200
Chr4	9513200	9513300
Chr5	10942200	10942300
Chr5	19830100	19830200

## Sheet: TableS2I 6way_hyperCHH_DMR_List
Chr3	22748300	22748400
Chr4	7099900	7100000
Chr5	18142200	18142300
Chr5	18142300	18142400
Chr5	18146800	18146900
Chr5	19830100	19830200

## Sheet: Table S2J 6way_hypoCG_DMR_List
Chr5	18560500	18560600

[truncated: 13 more sheets: Table S2K Master_hyperCG_DMRs, Table S2L Master_hyperCHG_DMRs, Table S2M Master_hyperCHH_DMRs, Table S2N Master_hypoCGDMRs, Table S2O Master_hypoCHG_DMRs, Table S2P Master_hypoCHH_DMRs, Table S2Q RelaxedDMRs_hyperCG, Table S2R RelaxedDMRs_hyperCHG, Table S2S RelaxedDMRs_hyperCHH, Table S2T RelaxedDMRs_hypoCG, Table S2U RelaxedDMRs_hypoCHH, TableS2vmbd7_lil_hyper_mC_merge, TableS2W rdd_3Wt_hyper_mC_merge]
