# Supplementary material for: The MBD7 complex promotes expression of methylated transgenes without significantly altering their methylation status
Source: eLife journal article supplement (doi:10.7554/elife.19893), 2017-04-28
Supplement: supp [file elife_poa_e19893_Supplementary_File_3.xlsx]

## Sheet: info
Table S12: Transcriptome profiling data in mbd7 and lil mutants
	Col_YJ (JL)	Col (JL)	mbd7-4 (JL)	mbd7-3 (JL)	YJ lil-1 (JL)	LUCH lil-2_r1 (XC)	LUCH lil-2_r2 (XC)	LUCH lil-2_r3 (XC)	LUCH_r1 (XC)	LUCH_r2 (XC)	LUCH_r3 (XC)	YJ lil-1_r1 (XC)	YJ lil-1_r2 (XC)	YJ lil-1_r3 (XC)	YJ_r1 (XC)	YJ_r2 (XC)	YJ_r3 (XC)
Input	9784390	9481600	8619938	7392926	9168123	13100893	16982643	14204930	15274426	14613721	15324965	15260035	14620841	14909506	14406195	17666302	14984296
Mapped	9013268	8608340	7964306	6814018	8523287	12920236	16780898	14014323	15084814	14425811	15132543	15067846	14454133	14739296	14198459	17413194	14769476
%	92.1	90.8	92.4	92.2	93	98.6	98.8	98.7	98.8	98.7	98.7	98.7	98.9	98.9	98.6	98.6	98.6
Multi-hits	329503	328101	269189	232385	296314	382757	476558	399152	448877	407171	449782	470257	417261	400747	421769	702074	462989
%	3.4	3.5	3.1	3.1	3.2	2.9	2.8	2.8	2.9	2.8	2.9	3.1	2.9	2.7	2.9	4	3.1
>20	18	17	13	13	18	18	22	15	10	12	17	15	10	15	8	15	15

## Sheet: FC2FDR0.05
Fold Change >= 2 & FDR <= 0.05	mbd7-4 (1 rep)	mbd7-3 (1 rep)	YJ lil-1 (JL) (1 rep)	YJ lil-1 (XC) (3 reps)	LUCH lil-2 (XC) (3 reps)
Reduced	23	26	36	8	91
Increased	79	103	7	3	83
			YJ-lil-1(JL)&YJ-lil-1(XC)
		Reduced	1=At5g35935*
		Increased	0
				YJ-lil-1 (XC)&LUCH-lil-2(XC)
			Reduced	3
			Increased	0
					YJ-lil-1(JL&XC)&YJ-lil-2(XC)
				Reduced	1=At5g35935*
	mbd7-4&mbd7-3			Increased	0
Reduced	12
Increased	36
		mbd7-4&mbd7-3&YJ-lil-1(JL&XC)
	Reduced	0
	Increased	0
			mbd7-4&mbd7-3&YJ-lil-1 (XC)&LUCH-lil-2(XC)
		Reduced	0
		Increased	0
*=known hypervariable gene

## Sheet: Venn data
	mbd7-4&mbd7-3				YJ-lil-1(JL)&YJ-lil-1(XC)				YJ-lil-1 (XC)&LUCH-lil-2(XC)				YJ-lil-1(JL&XC)&YJ-lil-2(XC)				mbd7-4&mbd7-3&YJ-lil-1(JL&XC)				mbd7-4&mbd7-3&YJ-lil-1 (XC)&LUCH-lil-2(XC)
Reduced	12			Reduced	1			Reduced	3			Reduced	1=At5g35935*			Reduced	0			Reduced	0
Increased	36			Increased	0			Increased	0			Increased	0			Increased	0			Increased	0
note: MBD7 (At5g59800) is not identified in this analysis because mbd7-4 is a knockdown while mbd7-3 is a 3' overexpression mutant.				Note: LIL (At1g20870) is not identified in this analysis because lil-1 is a point mutant that is expressed at the wt level.				Note: LIL (At1g20870) is not identified in this analysis because lil-1 is a point mutant that is expressed at the wt level.				Note: At3g35935 is a known hypervariable transposon
12 common		36 Common		1 common				3 common				1 common
AT1G21120		AT1G10550		AT5G35935				AT3G13270				AT5G35935
AT1G26380		AT1G15040						AT5G15360
AT1G26390		AT1G19900						AT5G35935
AT2G06845		AT1G21910
AT2G30750		AT1G25400
AT3G04140		AT1G51470
AT3G13610		AT1G51840
AT3G42658		AT1TE93275
AT3TE60310		AT2G01520
AT4G25480		AT2G32300
AT4G33720		AT2G35300
AT5G57220		AT2G41100
		AT2G47770
		AT3G01190
		AT3G15500
		AT3G21720
		AT3G29250
		AT3G48390
		AT4G00910
		AT4G01250
		AT4G12550
		AT4G15390
		AT4G18340
		AT4G26010
		AT4G39070

## Sheet: mbd7-4 (JL)
Reduced									Increased
	Raw Count		CPM		Pvalue	FDR	FoldChange (log2)			Raw Count		CPM		Pvalue	FDR	FoldChange (log2)
ID	Col	mbd7-4	Col	mbd7-4	mbd7-4/Col	mbd7-4/Col	mbd7-4/Col		ID	Col	mbd7-4	Col	mbd7-4	mbd7-4/Col	mbd7-4/Col	mbd7-4/Col
AT1G21120	33	7	3.83349	0.878922	7.14241e-05	0.0145814	-2.12485		AT1G08430	14	54	1.62633	6.78025	1.30378e-07	7.13541e-05	2.05972
AT1G26380	51	5	5.92449	0.627801	3.84332e-10	3.75667e-07	-3.23831		AT1G09575	29	65	3.36883	8.16141	3.91382e-05	0.00876695	1.27657
AT1G26390	35	0	4.06582	0	1.14821e-10	1.34679e-07	-Inf		AT1G10550	4	22	0.464666	2.76232	0.000143482	0.0256206	2.57162
AT1G76780	59	20	6.85382	2.5112	3.96778e-05	0.00885708	-1.44853		AT1G12740	11	36	1.27783	4.52017	7.58865e-05	0.0152037	1.82268
AT2G06845	14	0	1.62633	0	0.000108129	0.0207608	-Inf		AT1G15040	107	251	12.4298	31.5156	3.33336e-17	1.26495e-13	1.34226
AT2G30750	195	22	22.6525	2.76232	0	0	-3.03571		AT1G19900	1	23	0.116166	2.88789	6.20013e-07	0.000279708	4.63575
AT2G44740	83	36	9.64181	4.52017	8.67228e-05	0.0170569	-1.09293		AT1G21910	37	84	4.29816	10.5471	2.21095e-06	0.000796831	1.29505
AT3G04140	79	32	9.17715	4.01793	4.09764e-05	0.00911542	-1.19159		AT1G23720	62	140	7.20232	17.5784	1.11797e-09	9.87977e-07	1.28727
AT3G05950	32	8	3.71733	1.00448	0.000294013	0.045815	-1.88781		AT1G25400	54	125	6.27299	15.695	4.14826e-09	3.30386e-06	1.32308
AT3G13610	78	35	9.06098	4.39461	0.000247994	0.0396987	-1.04393		AT1G47600	9	54	1.0455	6.78025	5.56714e-10	5.28157e-07	2.69715
AT3G42658	19	0	2.20716	0	4.08866e-06	0.00133216	-Inf		AT1G51470	9	52	1.0455	6.52913	1.78659e-09	1.51654e-06	2.6427
AT3G45140	420	194	48.7899	24.3587	2.22045e-16	6.51115e-13	-1.00215		AT1G51840	32	76	3.71733	9.54258	2.96052e-06	0.0010159	1.36011
AT3TE60310	19	0	2.20716	0	4.08866e-06	0.00133216	-Inf		AT1G66270	57	116	6.62149	14.565	5.05105e-07	0.000236125	1.13728
AT4G21550	36	8	4.18199	1.00448	4.67951e-05	0.0100965	-2.05774		AT1G66280	49	98	5.69215	12.3049	5.79877e-06	0.00179851	1.11219
AT4G23600	122	53	14.1723	6.65469	1.93397e-06	0.000721179	-1.09063		AT1G79360	31	67	3.60116	8.41253	5.32818e-05	0.011386	1.22408
AT4G25480	59	15	6.85382	1.8834	8.84723e-07	0.000380854	-1.86357		AT1TE93275	4	36	0.464666	4.52017	2.73392e-08	1.71233e-05	3.28211
AT4G33720	93	35	10.8035	4.39461	1.91436e-06	0.000718017	-1.29769		AT2G01520	86	228	9.99031	28.6277	1.10182e-18	6.46187e-15	1.51881
AT4G39210	82	35	9.52565	4.39461	7.26376e-05	0.0147823	-1.11608		AT2G07677	1	16	0.116166	2.00896	7.64511e-05	0.0152694	4.11219
AT5G24150	60	20	6.96998	2.5112	2.71506e-05	0.00648718	-1.47278		AT2G32270	8	34	0.929331	4.26905	1.39331e-05	0.00371427	2.19965
AT5G24155	58	19	6.73765	2.38564	2.96559e-05	0.00696686	-1.49787		AT2G32300	12	36	1.394	4.52017	0.00016608	0.0288791	1.69715
AT5G53030	61	24	7.08615	3.01345	0.000218482	0.0358643	-1.23359		AT2G35300	14	49	1.62633	6.15245	1.61885e-06	0.000629127	1.91954
AT5G57220	74	30	8.59631	3.76681	7.34089e-05	0.0147992	-1.19038		AT2G41100	124	244	14.4046	30.6367	1.86697e-12	3.16953e-09	1.08873
AT5G59800 (MBD7)	93	16	10.8035	2.00896	2.50244e-13	4.89205e-10	-2.42697		AT2G45220	44	93	5.11132	11.6771	3.04745e-06	0.00102497	1.19191
									AT2G47770	0	14	0	1.75784	3.36799e-05	0.00778767	Inf
									AT3G01190	73	154	8.48015	19.3363	1.93185e-09	1.59778e-06	1.18915
									AT3G15500	36	97	4.18199	12.1793	6.32217e-09	4.97385e-06	1.54217
									AT3G20340	34	78	3.94966	9.7937	4.21184e-06	0.00135857	1.31013
									AT3G21720	43	106	4.99516	13.3094	1.25527e-08	9.20228e-06	1.41384
									AT3G24240	30	78	3.48499	9.7937	3.88774e-07	0.000190005	1.4907
									AT3G28550	56	113	6.50532	14.1883	8.85542e-07	0.000380854	1.12501
									AT3G29250	4	32	0.464666	4.01793	3.38296e-07	0.000171844	3.11219
									AT3G44326	6	26	0.696998	3.26457	0.000137146	0.0247139	2.22766
									AT3G46700	16	47	1.85866	5.90133	2.05499e-05	0.00513844	1.66678
									AT3G47790	29	61	3.36883	7.65917	0.000172691	0.0297084	1.18494
									AT3G48390	80	149	9.29331	18.7085	2.34595e-07	0.00012205	1.00943
									AT3G49960	4	26	0.464666	3.26457	1.3407e-05	0.00360381	2.81263
									AT3G50470	5	26	0.580832	3.26457	4.6229e-05	0.0100078	2.4907
									AT3G54580	26	65	3.02033	8.16141	6.92651e-06	0.00205918	1.43411
									AT4G00910	23	75	2.67183	9.41702	9.79125e-09	7.3448e-06	1.81744
									AT4G01250	39	111	4.53049	13.9372	1.143e-10	1.34679e-07	1.6212
									AT4G12490	0	13	0	1.63228	7.00834e-05	0.0143988	Inf
									AT4G12550	4	35	0.464666	4.39461	5.14796e-08	3.04684e-05	3.24147
									AT4G14560	64	121	7.43465	15.1928	2.15205e-06	0.000779959	1.03105
									AT4G15160	40	77	4.64666	9.66814	0.000116808	0.0221634	1.05704
									AT4G15340	18	48	2.091	6.02689	5.33012e-05	0.011386	1.52722
									AT4G15390	56	112	6.50532	14.0627	1.24397e-06	0.000502854	1.11219
									AT4G18340	15	40	1.7425	5.02241	0.00023054	0.0372746	1.52722
									AT4G22470	14	43	1.62633	5.39909	2.9062e-05	0.00686757	1.7311
									AT4G25580	67	158	7.78315	19.8385	1.87462e-11	2.74853e-08	1.34988
									AT4G26010	12	36	1.394	4.52017	0.00016608	0.0288791	1.69715
									AT4G26290	10	33	1.16166	4.14349	0.000143767	0.0256206	1.83465
									AT4G33120	5	31	0.580832	3.89237	2.49689e-06	0.00087543	2.74445
									AT4G39070	35	93	4.06582	11.6771	1.78853e-08	1.21454e-05	1.52206
									AT4G39675	34	77	3.94966	9.66814	6.17365e-06	0.00189587	1.29151
									AT5G03545	10	41	1.16166	5.14797	2.45928e-06	0.000867601	2.14781
									AT5G03860	28	59	3.25266	7.40805	0.000216044	0.0356457	1.18747
									AT5G13790	9	30	1.0455	3.76681	0.000273077	0.0432844	1.84915
									AT5G14470	19	60	2.20716	7.53361	4.87302e-07	0.000231302	1.77115
									AT5G17820	44	103	5.11132	12.9327	7.32703e-08	4.22037e-05	1.33926
									AT5G20240	10	34	1.16166	4.26905	8.80464e-05	0.0172123	1.87772
									AT5G23830	11	34	1.27783	4.26905	0.000197588	0.0332638	1.74022
									AT5G25440	30	62	3.48499	7.78473	0.000197675	0.0332638	1.15949
									AT5G28080	34	66	3.94966	8.28697	0.000320857	0.0491665	1.06912
									AT5G35935	27	177	3.13649	22.2242	4.36659e-31	1.40849e-26	2.8249
									AT5G39580	47	87	5.45982	10.9237	8.99812e-05	0.0175374	1.00054
									AT5G41080	120	283	13.94	35.5335	2.32707e-19	1.50124e-15	1.34995
									AT5G46050	42	85	4.87899	10.6726	1.93407e-05	0.00485489	1.12926
									AT5G47450	27	120	3.13649	15.0672	4.71469e-17	1.60081e-13	2.26419
									AT5G47990	3	44	0.348499	5.52465	2.46039e-11	3.45417e-08	3.98666
									AT5G48000	4	41	0.464666	5.14797	1.116e-09	9.87977e-07	3.46974
									AT5G48010	2	31	0.232333	3.89237	2.09672e-08	1.39447e-05	4.06638
									AT5G48110	40	110	4.64666	13.8116	3.51443e-10	3.54255e-07	1.57162
									AT5G51060	7	28	0.813165	3.51569	0.000126677	0.023416	2.11219
									AT5G51780	39	77	4.53049	9.66814	7.47176e-05	0.0150161	1.09357
									AT5G56550	85	190	9.87415	23.8564	1.95131e-12	3.22777e-09	1.27265
									AT5G57090	43	83	4.99516	10.4215	5.98949e-05	0.0125644	1.06096
									AT5G60530	6	27	0.696998	3.39013	7.94273e-05	0.0157662	2.28211
									AT5G66390	49	99	5.69215	12.4305	4.12119e-06	0.00133601	1.12683
									AT5TE50260	7	28	0.813165	3.51569	0.000126677	0.023416	2.11219

## Sheet: mbd7-3 (JL)
Reduced									Increased
	Raw Count		CPM		Pvalue	FDR	FoldChange (log2)			Raw Count		CPM		Pvalue	FDR	FoldChange (log2)
ID	Col	mbd7-3	Col	mbd7-3	mbd7-3/Col	mbd7-5/Col	mbd7-3/Col		ID	Col	mbd7-3	Col	mbd7-3	mbd7-3/Col	mbd7-3/Col	mbd7-3/Col
AT1G02930	233	91	27.0668	13.3548	2.71664e-09	1.43652e-06	-1.01916		AT1G02380	11	32	1.27783	4.6962	6.5545e-05	0.0080236	1.8778
AT1G18970	27	4	3.13649	0.587025	0.000266517	0.0243535	-2.41766		AT1G02610	72	122	8.36398	17.9043	1.728e-07	5.33383e-05	1.09804
AT1G20390	685	264	79.574	38.7437	0	0	-1.03834		AT1G02640	160	271	18.5866	39.771	6.70551e-15	1.1092e-11	1.09745
AT1G21120	33	5	3.83349	0.733781	5.75205e-05	0.00721938	-2.38524		AT1G07135	34	79	3.94966	11.5937	3.65701e-08	1.46535e-05	1.55355
AT1G26380	51	3	5.92449	0.440269	3.30371e-10	2.3229e-07	-3.75023		AT1G10550	4	18	0.464666	2.64161	0.000368019	0.0313628	2.50715
AT1G26390	35	0	4.06582	0	1.53003e-09	8.89238e-07	-Inf		AT1G14860	38	66	4.41432	9.68592	8.08062e-05	0.00951271	1.1337
AT1G66700	15	0	1.7425	0	0.000177553	0.0179253	-Inf		AT1G15040	107	189	12.4298	27.7369	1.0918e-11	1.13507e-08	1.158
AT1G68570	63	21	7.31848	3.08188	0.000315614	0.0277775	-1.24773		AT1G17190	28	54	3.25266	7.92484	8.2743e-05	0.00967014	1.28476
AT1TE22850	593	225	68.8867	33.0202	0	0	-1.06088		AT1G17345	0	10	0	1.46756	0.0002505	0.0233868	Inf
AT2G06845	14	0	1.62633	0	0.000318097	0.0279579	-Inf		AT1G19380	23	48	2.67183	7.0443	7.46644e-05	0.00895306	1.39863
AT2G30750	195	10	22.6525	1.46756	0	0	-3.94817		AT1G19900	1	16	0.116166	2.3481	1.95436e-05	0.00291177	4.33723
AT2G43570	85	24	9.87415	3.52215	1.63372e-06	0.000380487	-1.4872		AT1G21910	37	120	4.29816	17.6108	2.21713e-16	4.3343e-13	2.03467
AT2G46830	121	46	14.0561	6.75079	1.05727e-05	0.00179965	-1.05807		AT1G25400	54	104	6.27299	15.2627	4.66811e-08	1.82514e-05	1.28278
AT3G04140	79	30	9.17715	4.40269	0.000383265	0.0322362	-1.05966		AT1G27020	130	214	15.1016	31.4058	1.96792e-11	1.86698e-08	1.05633
AT3G05660	49	11	5.69215	1.61432	3.09508e-05	0.00429397	-1.81805		AT1G27730	16	35	1.85866	5.13647	0.00046429	0.037347	1.46651
AT3G13610	78	22	9.06098	3.22864	4.38675e-06	0.000889931	-1.48874		AT1G30760	8	37	0.929331	5.42998	1.93181e-07	5.82359e-05	2.54668
AT3G18610	23	3	2.67183	0.440269	0.000492339	0.0388761	-2.60137		AT1G30870	11	29	1.27783	4.25593	0.000322663	0.0282821	1.73578
AT3G42658	19	0	2.20716	0	1.72347e-05	0.00262227	-Inf		AT1G35140	83	218	9.64181	31.9929	3.7838e-23	1.10955e-19	1.73037
AT3TE60310	19	0	2.20716	0	1.72347e-05	0.00262227	-Inf		AT1G43590	7	29	0.813165	4.25593	9.5691e-06	0.0016775	2.38786
AT4G25480	59	20	6.85382	2.93513	0.000603414	0.045476	-1.22349		AT1G48130	0	12	0	1.76108	4.89004e-05	0.0062717	Inf
AT4G33720	93	6	10.8035	0.880538	0	0	-3.61697		AT1G50040	88	143	10.2226	20.9861	6.56664e-08	2.43106e-05	1.03767
AT5G40980	25	4	2.90416	0.587025	0.000660927	0.0488964	-2.30663		AT1G51470	9	25	1.0455	3.66891	0.000593252	0.0449729	1.81116
AT5G42830	25	0	2.90416	0	5.21212e-07	0.000141875	-Inf		AT1G51840	32	59	3.71733	8.65862	7.78088e-05	0.00921027	1.21987
AT5G52910	123	48	14.2885	7.0443	1.61574e-05	0.00250565	-1.02032		AT1G51850	46	80	5.34366	11.7405	1.37894e-05	0.00224076	1.1356
AT5G57220	74	20	8.59631	2.93513	4.13481e-06	0.00085222	-1.5503		AT1G52690	3	31	0.348499	4.54944	1.08859e-08	5.12605e-06	3.70646
AT5G67150	48	14	5.57599	2.05459	0.00047681	0.0379753	-1.44038		AT1G53480	1	56	0.116166	8.21835	3.94916e-19	9.79877e-16	6.14458
									AT1G53490	4	62	0.464666	9.09889	7.00236e-18	1.61334e-14	4.29143
									AT1G53830	10	30	1.16166	4.40269	8.69218e-05	0.0100673	1.92219
									AT1G76650	7	27	0.813165	3.96242	3.24606e-05	0.00444785	2.28476
									AT1G77640	9	25	1.0455	3.66891	0.000593252	0.0449729	1.81116
									AT1TE54100	7	31	0.813165	4.54944	2.75734e-06	0.000607103	2.48407
									AT1TE93275	4	32	0.464666	4.6962	2.7703e-08	1.11698e-05	3.33723
									AT2G01520	86	144	9.99031	21.1329	2.06598e-08	8.82654e-06	1.08089
									AT2G16980	6	29	0.696998	4.25593	3.15053e-06	0.000679756	2.61025
									AT2G18540	0	10	0	1.46756	0.0002505	0.0233868	Inf
									AT2G19800	277	483	32.1781	70.8833	7.89317e-27	3.18252e-23	1.13937
									AT2G19900	6	21	0.696998	3.08188	0.000444916	0.0360998	2.14458
									AT2G32300	12	32	1.394	4.6962	0.000141311	0.0149938	1.75227
									AT2G35300	14	48	1.62633	7.0443	1.12645e-07	3.74584e-05	2.11484
									AT2G36690	40	76	4.64666	11.1535	3.98707e-06	0.000829721	1.26323
									AT2G41100	124	238	14.4046	34.928	1.62537e-16	3.27675e-13	1.27785
									AT2G47770	0	13	0	1.90783	2.16055e-05	0.00318951	Inf
									AT2TE35695	54	89	6.27299	13.0613	1.49562e-05	0.00237649	1.05808
									AT3G01190	73	138	8.48015	20.2524	5.94425e-10	3.83475e-07	1.25593
									AT3G08860	2	16	0.232333	2.3481	0.000108346	0.0121288	3.33723
									AT3G10710	2	16	0.232333	2.3481	0.000108346	0.0121288	3.33723
									AT3G15500	36	60	4.18199	8.80538	0.00032182	0.0282466	1.07419
									AT3G15670	1	17	0.116166	2.49486	9.09456e-06	0.00161184	4.42469
									AT3G17520	1	30	0.116166	4.40269	3.68451e-10	2.52867e-07	5.24412
									AT3G21720	43	70	4.99516	10.2729	0.000153574	0.0160313	1.04025
									AT3G23190	10	28	1.16166	4.10918	0.000257536	0.0237684	1.82266
									AT3G28915	1	27	0.116166	3.96242	3.88106e-09	2.01915e-06	5.09212
									AT3G29250	4	22	0.464666	3.22864	2.70382e-05	0.00384205	2.79666
									AT3G44260	46	91	5.34366	13.3548	1.70064e-07	5.27459e-05	1.32146
									AT3G48340	7	27	0.813165	3.96242	3.24606e-05	0.00444785	2.28476
									AT3G48390	80	133	9.29331	19.5186	9.01263e-08	3.09267e-05	1.07058
									AT3G53040	3	30	0.348499	4.40269	2.25779e-08	9.4581e-06	3.65916
									AT3G56400	40	88	4.64666	12.9146	2.24206e-08	9.45357e-06	1.47473
									AT3G62950	45	74	5.22749	10.86	8.25416e-05	0.00966411	1.05483
									AT3TE45385	1	28	0.116166	4.10918	1.77232e-09	1.01182e-06	5.14458
									AT4G00680	0	13	0	1.90783	2.16055e-05	0.00318951	Inf
									AT4G00910	23	56	2.67183	8.21835	1.77483e-06	0.000410386	1.62102
									AT4G01250	39	68	4.53049	9.97943	5.88442e-05	0.00734267	1.13929
									AT4G08950	195	367	22.6525	53.8596	7.99652e-24	2.71511e-20	1.24954
									AT4G12550	4	29	0.464666	4.25593	2.27658e-07	6.76805e-05	3.19521
									AT4G13390	3	22	0.348499	3.22864	6.92728e-06	0.00129911	3.2117
									AT4G15390	56	98	6.50532	14.3821	1.27591e-06	0.000307132	1.14458
									AT4G15400	10	28	1.16166	4.10918	0.000257536	0.0237684	1.82266
									AT4G16563	128	248	14.8693	36.3956	2.08876e-17	4.64656e-14	1.29143
									AT4G18340	15	35	1.7425	5.13647	0.000248541	0.0232712	1.55962
									AT4G18550	8	34	0.929331	4.98971	1.2637e-06	0.000305333	2.42469
									AT4G22666	5	20	0.580832	2.93513	0.000305405	0.0271008	2.33723
									AT4G25820	9	39	1.0455	5.7235	1.67964e-07	5.23463e-05	2.45271
									AT4G26010	12	35	1.394	5.13647	2.87141e-05	0.00402697	1.88155
									AT4G27280	91	156	10.5711	22.894	2.16857e-09	1.18558e-06	1.11484
									AT4G38830	0	9	0	1.32081	0.000566963	0.0433364	Inf
									AT4G39070	35	62	4.06582	9.09889	9.73306e-05	0.011133	1.16214
									AT4G40090	6	22	0.696998	3.22864	0.000245508	0.0230878	2.2117
									AT4TE42070	56	101	6.50532	14.8224	4.04668e-07	0.000112043	1.18809
									AT5G03860	28	50	3.25266	7.33781	0.00042191	0.0347171	1.17373
									AT5G04960	7	24	0.813165	3.52215	0.000193108	0.0189041	2.11484
									AT5G08150	22	49	2.55566	7.19106	2.63234e-05	0.00376487	1.49251
									AT5G14470	19	43	2.20716	6.31052	6.88169e-05	0.00834496	1.51557
									AT5G17820	44	87	5.11132	12.7678	3.21154e-07	9.21189e-05	1.32074
									AT5G18840	16	58	1.85866	8.51186	2.24824e-09	1.21881e-06	2.19521
									AT5G40730	25	49	2.90416	7.19106	0.000143851	0.0151884	1.30808
									AT5G41080	120	277	13.94	40.6515	8.299e-25	2.97436e-21	1.54408
									AT5G42180	21	42	2.43949	6.16376	0.000346158	0.0301775	1.33723
									AT5G44417	24	49	2.78799	7.19106	8.39434e-05	0.00978713	1.36698
									AT5G44910	25	53	2.90416	7.77808	2.50095e-05	0.00362634	1.42129
									AT5G45340	11	40	1.27783	5.87025	7.07383e-07	0.000184756	2.19973
									AT5G47450	27	115	3.13649	16.877	2.6187e-19	6.7575e-16	2.42783
									AT5G47950	12	32	1.394	4.6962	0.000141311	0.0149938	1.75227
									AT5G47990	3	25	0.348499	3.66891	8.30352e-07	0.000214271	3.39612
									AT5G48010	2	15	0.232333	2.20134	0.000220526	0.021202	3.24412
									AT5G48110	40	73	4.64666	10.7132	1.33332e-05	0.0021721	1.20513
									AT5G51060	7	24	0.813165	3.52215	0.000193108	0.0189041	2.11484
									AT5G56550	85	135	9.87415	19.8121	3.21285e-07	9.21189e-05	1.00465
									AT5G57560	389	638	45.1887	93.6305	8.4399e-31	4.94977e-27	1.05102
									AT5G59800 (MBD7)	93	1018	10.8035	149.398	6.31925e-248	8.15335e-244	3.78959
									AT5G60660	28	67	3.25266	9.83267	2.34018e-07	6.8936e-05	1.59596
									AT5G66390	49	81	5.69215	11.8873	3.4208e-05	0.00463619	1.06237
									AT5G67400	4	20	0.464666	2.93513	0.000101096	0.0115024	2.65916

## Sheet: YJ lil-1 (JL)
Reduced									Increased
	Raw Count		CPM		Pvalue	FDR	FoldChange (log2)			Raw Count		CPM		Pvalue	FDR	FoldChange (log2)
ID	Col_YJ (JL)	YJ lil-1 (JL)	Col_YJ (JL)	YJ lil-1 (JL)	YJ lil-1 (JL)/ Col_YJ (JL)	YJ lil-1 (JL)/ Col_YJ (JL)	YJ lil-1 (JL)/ Col_YJ (JL)		ID	Col_YJ (JL)	YJ lil-1 (JL)	Col_YJ (JL)	YJ lil-1 (JL)	YJ lil-1 (JL)/ Col_YJ (JL)	YJ lil-1 (JL)/ Col_YJ (JL)	YJ lil-1 (JL)/ Col_YJ (JL)
AT1G07180	79	29	8.76486	3.40244	4.43973e-06	0.00415096	-1.36516		AT1G26250	39	110	4.32695	12.9058	4.15243e-10	1.33941e-06	1.5766
AT1G14880	47	0	5.21453	0	2.66454e-14	1.71895e-10	-Inf		AT1G49230	37	77	4.10506	9.03407	4.82241e-05	0.0285416	1.13797
AT1G21250	49	2	5.43643	0.234651	2.30038e-12	1.14156e-08	-4.53407		AT1G51090	39	96	4.32695	11.2633	1.2716e-07	0.000221712	1.3802
AT1G32100	122	57	13.5356	6.68756	5.98599e-06	0.00514716	-1.01721		AT1G56150	30	73	3.32843	8.56477	5.14531e-06	0.0046102	1.36357
AT1G33960	27	2	2.99558	0.234651	1.78104e-06	0.00191498	-3.67425		AT2G42200	48	91	5.32548	10.6766	6.59624e-05	0.0370032	1.00347
AT1G35710	64	21	7.10064	2.46384	7.30072e-06	0.0058873	-1.52704		AT3G44260	57	117	6.32401	13.7271	7.55359e-07	0.000965127	1.11812
AT1G43790	100	37	11.0948	4.34105	2.77739e-07	0.000416685	-1.35376		AT5G35940	1	25	0.110948	2.93314	2.04878e-07	0.000330427	4.7245
AT1G43800	31	6	3.43937	0.703954	5.01702e-05	0.0291584	-2.28859
AT1G47600	51	4	5.65833	0.469303	4.13765e-11	1.77952e-07	-3.59178
AT1G51470	51	10	5.65833	1.17326	1.82643e-07	0.00030212	-2.26986
AT1G73870	110	51	12.2042	5.98361	1.45745e-05	0.0102199	-1.02829
AT2G14560	86	5	9.54149	0.586628	0	0	-4.0237
AT2G14610	23	0	2.55179	0	2.30963e-07	0.000363412	-Inf
AT2G24850	18	0	1.99706	0	6.4395e-06	0.00539513	-Inf
AT2G25510	176	21	19.5268	2.46384	0	0	-2.98647
AT2G26440	110	48	12.2042	5.63163	3.6166e-06	0.00353506	-1.11576
AT2G46790	79	25	8.76486	2.93314	3.14723e-07	0.000461442	-1.57928
AT3G16440	55	10	6.10212	1.17326	2.46081e-08	5.44184e-05	-2.37879
AT3G16530	82	35	9.0977	4.1064	4.41633e-05	0.0266268	-1.14763
AT3G21550	75	24	8.32107	2.81582	7.62982e-07	0.000965127	-1.56322
AT3G21720	135	61	14.9779	7.15686	7.50722e-07	0.000965127	-1.06544
AT3G22060	107	48	11.8714	5.63163	9.18002e-06	0.00705026	-1.07586
AT3G22231	28	2	3.10653	0.234651	9.76182e-07	0.00118822	-3.72671
AT3G32295	93	31	10.3181	3.63709	8.28249e-08	0.000161915	-1.50432
AT3G62020	61	23	6.7678	2.69849	8.21787e-05	0.0445505	-1.32654
AT3TE54180	179	56	19.8596	6.57024	6.88338e-15	4.93401e-11	-1.59582
AT4G00910	91	42	10.0962	4.92768	7.50211e-05	0.0410149	-1.03484
AT4G12490	33	1	3.66127	0.117326	5.20677e-09	1.39958e-05	-4.96375
AT4G14400	118	42	13.0918	4.92768	8.41636e-09	2.17182e-05	-1.40969
AT4G21380	33	6	3.66127	0.703954	1.8204e-05	0.0123619	-2.37879
AT5G03350	43	6	4.77074	0.703954	9.27625e-08	0.000176009	-2.76066
AT5G04200	51	15	5.65833	1.75988	1.80691e-05	0.0123619	-1.68489
AT5G10760	45	3	4.99264	0.351977	2.28632e-10	9.21842e-07	-3.82625
AT5G35935	183	1	20.3034	0.117326	0	0	-7.43506
AT5G42530	154	38	17.0859	4.45837	2.22045e-16	2.04636e-12	-1.93822
AT5G52570	58	18	6.43496	2.11186	9.53876e-06	0.00723958	-1.60742

## Sheet: YJ lil-1 (XC)
Reduced																		Increased
					Raw Count						CPM												Raw Count						CPM
	logFC	logCPM	PValue	FDR	YJ_r1	YJ_r2	YJ_r3	YJ lil-1_r1	YJ lil-1_r2	YJ lil-1_r3	YJ_r1	YJ_r2	YJ_r3	YJ lil-1_r1	YJ lil-1_r2	YJ lil-1_r3			logFC	logCPM	PValue	FDR	YJ_r1	YJ_r2	YJ_r3	YJ lil-1_r1	YJ lil-1_r2	YJ lil-1_r3	YJ_r1	YJ_r2	YJ_r3	YJ lil-1_r1	YJ lil-1_r2	YJ lil-1_r3
AT1TE93275	-5.91994	2.76074	7.46009e-23	2.40633e-18	47	88	55	1	1	1	8.8903	19.4575	10.375	0.184106	0.194925	0.186518		AT1G73805	1.44388	5.71117	3.4024e-06	0.0199541	160	105	160	208	466	530	30.2648	23.2163	30.1817	38.294	90.8349	98.8545
AT2G01422	-4.36232	3.99097	7.14891e-12	1.5373e-07	141	131	179	21	0	2	26.6709	28.9651	33.7658	3.86622	0	0.373036		AT2TE18435	6.09762	0.287242	4.75882e-07	0.00511668	0	0	0	9	6	11	0	0	0	1.65695	1.16955	2.0517
AT2G16367	-3.19944	1.71655	1.70852e-06	0.0122467	10	31	39	7	0	2	1.89155	6.85434	7.35679	1.28874	0	0.373036		AT3G01420	1.35523	4.90902	3.18549e-07	0.00411005	126	54	74	209	240	228	23.8336	11.9398	13.959	38.4781	46.7819	42.5261
AT3G01345	-6.32203	3.1597	3.14191e-06	0.0199541	201	58	1	0	1	2	38.0202	12.8242	0.188636	0	0.194925	0.373036
AT3G13270	-1.68634	2.60021	8.33339e-07	0.00672005	35	51	45	16	15	12	6.62043	11.2765	8.4886	2.94569	2.92387	2.23822
AT5G15360	-7.5644	1.41558	4.33243e-08	0.000698734	54	5	12	0	0	0	10.2144	1.10554	2.26363	0	0	0
AT5G26220	-1.42562	3.94251	5.71874e-07	0.00527039	131	118	80	42	36	52	24.7793	26.0907	15.0908	7.73244	7.01729	9.69894
AT5G35935	-4.492	3.53713	2.97629e-26	1.92006e-21	132	70	129	11	1	3	24.9685	15.4775	24.334	2.02516	0.194925	0.559554

## Sheet: LUCH lil-2 (XC)
Reduced																		Increased
					Raw Count						CPM												Raw Count						CPM
	logFC	logCPM	PValue	FDR	LUCH_r1	LUCH_r2	LUCH_r3	LUCH lil-2_r1	LUCH lil-2_r2	LUCH lil-2_r3	LUCH_r1	LUCH_r2	LUCH_r3	LUCH lil-2_r1	LUCH lil-2_r2	LUCH lil-2_r3			logFC	logCPM	PValue	FDR	LUCH_r1	LUCH_r2	LUCH_r3	LUCH lil-2_r1	LUCH lil-2_r2	LUCH lil-2_r3	LUCH_r1	LUCH_r2	LUCH_r3	LUCH lil-2_r1	LUCH lil-2_r2	LUCH lil-2_r3
AT1G03020	-2.73567	0.181356	0.000245372	0.041009	5	10	7	1	1	1	0.902521	1.88471	1.28773	0.19908	0.16594	0.18848		AT1G09080	1.01042	2.61028	0.000257474	0.042051	23	23	16	40	32	53	4.1516	4.33484	2.94339	7.96319	5.31007	9.98944
AT1G05675	-1.06269	5.49127	7.04471e-06	0.00237942	278	304	399	80	204	194	50.1802	57.2953	73.4007	15.9264	33.8517	36.5651		AT1G14120	1.04073	2.90954	5.21776e-06	0.00186828	28	28	20	56	50	51	5.05412	5.2772	3.67923	11.1485	8.29699	9.61248
AT1G07160	-2.34524	0.92604	3.62029e-06	0.00145064	12	12	18	3	3	2	2.16605	2.26166	3.31131	0.59724	0.497819	0.37696		AT1G14780	1.13841	3.71342	9.8669e-05	0.0205333	31	40	58	53	110	125	5.59563	7.53886	10.6698	10.5512	18.2534	23.56
AT1G11740	-1.32611	2.23021	2.40799e-05	0.00628924	39	24	38	19	10	11	7.03966	4.52331	6.99054	3.78252	1.6594	2.07328		AT1G15580	1.55835	1.36354	0.000157103	0.0292919	3	3	12	13	19	22	0.541513	0.565414	2.20754	2.58804	3.15285	4.14656
AT1G13300	-1.27193	2.72492	4.34278e-07	0.000237425	47	45	52	12	32	16	8.4837	8.48122	9.566	2.38896	5.31007	3.01568		AT1G20900	1.45118	2.69768	2.09463e-07	0.000123971	12	21	20	31	58	58	2.16605	3.9579	3.67923	6.17148	9.6245	10.9318
AT1G14540	-1.56853	3.10973	2.29754e-05	0.00607454	47	53	101	9	35	25	8.4837	9.98899	18.5801	1.79172	5.80789	4.712		AT1G32910	2.71659	0.179832	0.000282367	0.0448672	2	1	0	3	12	7	0.361008	0.188471	0	0.59724	1.99128	1.31936
AT1G17147	-1.15984	3.72246	8.29142e-08	5.45812e-05	96	76	117	28	50	52	17.3284	14.3238	21.5235	5.57424	8.29699	9.80096		AT1G44180	3.0218	0.0157346	0.000321005	0.0499004	0	0	2	7	8	4	0	0	0.367923	1.39356	1.32752	0.75392
AT1G20823	-1.10065	3.98685	1.36341e-06	0.000645747	87	106	151	58	62	41	15.7039	19.978	27.7782	11.5466	10.2883	7.72768		AT1G52060	2.6329	0.396633	9.27596e-05	0.01962	3	1	0	8	15	4	0.541513	0.188471	0	1.59264	2.4891	0.75392
AT1G20870 (LIL)	-1.3544	1.91491	0.000204084	0.0353921	39	25	16	13	8	10	7.03966	4.71179	2.94339	2.58804	1.32752	1.8848		AT1G52070	2.46741	1.29073	9.91092e-06	0.0030592	9	1	0	14	32	12	1.62454	0.188471	0	2.78712	5.31007	2.26176
AT1G21120	-1.15631	4.74752	4.36345e-08	3.05973e-05	161	177	257	61	124	86	29.0612	33.3594	47.2781	12.1439	20.5765	16.2093		AT1G52100	1.3714	5.11391	2.97227e-21	2.13052e-17	129	105	77	257	297	254	23.285	19.7895	14.165	51.1635	49.2841	47.8739
AT1G22470	-1.07542	2.9444	9.34893e-06	0.00291361	54	66	42	22	25	30	9.74723	12.4391	7.72639	4.37976	4.14849	5.6544		AT1G55010	1.59328	1.94664	3.95028e-06	0.00152599	12	5	11	26	41	19	2.16605	0.942357	2.02358	5.17608	6.80353	3.58112
AT1G24140	-1.07454	4.36027	4.94665e-05	0.0115205	94	157	193	52	104	59	16.9674	29.59	35.5046	10.3522	17.2577	11.1203		AT1G66270	1.0855	3.45145	1.97596e-05	0.00542439	56	28	26	62	102	72	10.1082	5.2772	4.783	12.343	16.9259	13.5706
AT1G30190	-1.96163	2.74159	3.43553e-12	5.54082e-09	49	70	45	17	14	11	8.84471	13.193	8.27827	3.38436	2.32316	2.07328		AT1G68850	1.43316	2.16875	1.57996e-05	0.00453006	13	12	11	31	49	19	2.34655	2.26166	2.02358	6.17148	8.13105	3.58112
AT1G30370	-1.80919	2.75374	3.3401e-08	2.42109e-05	52	42	68	23	18	5	9.38622	7.9158	12.5094	4.57884	2.98691	0.9424		AT1G69880	1.4986	1.8389	3.96396e-05	0.00957765	11	5	11	16	40	22	1.98555	0.942357	2.02358	3.18528	6.63759	4.14656
AT1G33760	-1.12872	4.18963	1.63074e-08	1.22329e-05	104	165	130	57	75	52	18.7724	31.0978	23.915	11.3476	12.4455	9.80096		AT1G70880	2.43715	0.493966	0.000111984	0.0227895	2	2	1	9	16	4	0.361008	0.376943	0.183962	1.79172	2.65504	0.75392
AT1G33770	-1.31809	3.07868	3.46475e-08	2.48353e-05	57	56	75	18	39	19	10.2887	10.5544	13.7971	3.58344	6.47165	3.58112		AT1G73260	1.1501	3.11067	0.000249169	0.0413223	38	23	22	52	98	38	6.85916	4.33484	4.04716	10.3522	16.2621	7.16224
AT1G35210	-1.36882	4.64216	4.5081e-24	4.84711e-20	190	188	200	67	94	64	34.2958	35.4326	36.7923	13.3384	15.5983	12.0627		AT1G74010	1.32589	1.72391	0.000253195	0.0417753	11	6	10	15	35	19	1.98555	1.13083	1.83962	2.9862	5.80789	3.58112
AT1G50750	-1.10405	2.50402	6.28334e-05	0.0140747	28	48	42	18	20	17	5.05412	9.04663	7.72639	3.58344	3.31879	3.20416		AT1G76240	1.07953	3.00579	4.62359e-07	0.000248564	24	27	29	57	57	56	4.3321	5.08873	5.33489	11.3476	9.45856	10.5549
AT1G56240	-1.11376	5.42099	1.06094e-11	1.5917e-08	286	284	376	102	172	167	51.6242	53.5259	69.1696	20.3061	28.5416	31.4761		AT1G77520	2.24561	0.556152	0.000167307	0.0307502	4	2	0	12	13	5	0.722017	0.376943	0	2.38896	2.15722	0.9424
AT1G56242	-1.11125	5.27027	2.43842e-11	3.27723e-08	258	251	342	93	152	152	46.5701	47.3063	62.9149	18.5144	25.2228	28.6489		AT1G80130	1.25326	3.34571	7.16363e-08	4.81396e-05	23	32	39	80	91	55	4.1516	6.03109	7.1745	15.9264	15.1005	10.3664
AT1G56250	-1.50239	4.7447	8.15257e-21	5.25939e-17	210	191	236	51	102	74	37.9059	35.998	43.4149	10.1531	16.9259	13.9475		AT2G02120	1.47241	1.81612	1.2757e-05	0.00381008	10	7	10	18	29	29	1.80504	1.3193	1.83962	3.58344	4.81225	5.46592
AT1G61340	-1.21187	5.59779	6.01611e-11	7.32286e-08	342	322	429	96	199	183	61.7324	60.6878	78.9195	19.1117	33.022	34.4918		AT2G02680	1.28932	1.69825	0.000220532	0.0377373	9	11	7	19	30	18	1.62454	2.07319	1.28773	3.78252	4.97819	3.39264
AT1G66540	-2.04025	1.75327	8.95706e-09	7.1338e-06	31	25	23	7	7	5	5.59563	4.71179	4.23112	1.39356	1.16158	0.9424		AT2G18010	1.6577	1.0372	0.000250836	0.0414921	8	2	3	13	16	13	1.44403	0.376943	0.551885	2.58804	2.65504	2.45024
AT1G72910	-1.44369	4.87284	2.596e-05	0.00669892	297	228	166	131	84	36	53.6098	42.9715	30.5376	26.0795	13.9389	6.78528		AT2G18150	1.58757	3.46752	2.79621e-06	0.00116416	41	28	17	70	141	54	7.40067	5.2772	3.12735	13.9356	23.3975	10.1779
AT1G72920	-1.65846	3.33347	8.7952e-09	7.09245e-06	116	59	66	30	28	18	20.9385	11.1198	12.1415	5.9724	4.64631	3.39264		AT2G18370	1.92199	3.3051	1.71427e-12	2.91029e-09	20	22	22	64	124	60	3.61008	4.14637	4.04716	12.7411	20.5765	11.3088
AT1G72950	-1.19075	2.43053	4.17094e-06	0.00157354	43	34	37	12	21	17	7.76168	6.40803	6.80658	2.38896	3.48473	3.20416		AT2G19590	1.39958	3.3605	5.02792e-06	0.00182225	23	28	37	40	93	103	4.1516	5.2772	6.80658	7.96319	15.4324	19.4134
AT1G78410	-1.06185	3.59954	1.612e-07	9.71903e-05	81	74	104	32	57	36	14.6208	13.9469	19.132	6.37056	9.45856	6.78528		AT2G21100	1.55501	2.17827	6.98308e-05	0.0154278	14	9	11	35	52	15	2.52706	1.69624	2.02358	6.9678	8.62887	2.8272
AT1TE71790	-1.09508	2.25638	0.000149511	0.0283571	29	27	42	9	20	17	5.23462	5.08873	7.72639	1.79172	3.31879	3.20416		AT2G23540	1.44688	3.51664	2.5912e-07	0.000151967	35	36	25	80	133	54	6.31765	6.78497	4.59904	15.9264	22.07	10.1779
AT1TE80810	-2.24363	1.32967	1.11345e-07	7.04226e-05	19	19	20	3	3	6	3.42958	3.58096	3.67923	0.59724	0.497819	1.13088		AT2G24430	2.33824	0.429949	0.000209109	0.0359734	2	1	2	7	14	6	0.361008	0.188471	0.367923	1.39356	2.32316	1.13088
AT2G04460	-1.79968	0.925742	0.000256739	0.042051	9	11	19	2	5	4	1.62454	2.07319	3.49527	0.39816	0.829699	0.75392		AT2G29740	1.0444	3.4761	1.92486e-06	0.000850526	37	38	39	51	98	89	6.67866	7.16192	7.1745	10.1531	16.2621	16.7747
AT2G13550	-1.12834	2.65727	3.78799e-06	0.00149006	50	38	45	18	28	15	9.02521	7.16192	8.27827	3.58344	4.64631	2.8272		AT2G34080	1.46469	1.71238	1.85639e-05	0.00513988	9	6	10	18	26	26	1.62454	1.13083	1.83962	3.58344	4.31443	4.90048
AT2G22880	-1.42852	3.24709	2.70941e-07	0.000156062	80	60	77	11	30	40	14.4403	11.3083	14.165	2.18988	4.97819	7.5392		AT2G38390	1.39259	4.31916	1.85218e-11	2.65529e-08	53	58	64	124	224	120	9.56672	10.9313	11.7735	24.6859	37.1705	22.6176
AT2G24610	-1.00942	3.31053	0.000242776	0.0406805	72	56	80	16	39	49	12.9963	10.5544	14.7169	3.18528	6.47165	9.23552		AT2G40370	1.72231	1.94548	2.42447e-06	0.00104272	9	8	9	16	45	27	1.62454	1.50777	1.65565	3.18528	7.46729	5.08896
AT2G29300	-1.0316	4.66944	1.44536e-09	1.41277e-06	201	165	183	104	103	62	36.2813	31.0978	33.665	20.7043	17.0918	11.6858		AT2G43140	1.75683	3.5537	1.24482e-05	0.00375262	15	45	24	55	84	148	2.70756	8.48122	4.41508	10.9494	13.9389	27.895
AT2G37430	-2.45821	3.52152	8.11733e-27	1.30916e-22	116	87	104	16	30	10	20.9385	16.397	19.132	3.18528	4.97819	1.8848		AT2G47200	1.84414	1.2548	0.000210098	0.0360475	6	2	6	16	29	7	1.08303	0.376943	1.10377	3.18528	4.81225	1.31936
AT2G39650	-1.28624	5.16924	1.66764e-16	5.97681e-13	235	283	304	94	153	94	42.4185	53.3374	55.9243	18.7135	25.3888	17.7171		AT2G48140	1.7569	2.43481	2.17367e-06	0.000947484	19	7	11	36	67	25	3.42958	1.3193	2.02358	7.16688	11.118	4.712
AT2G40140	-1.02291	7.09024	1.29966e-26	1.67687e-22	991	953	1022	482	577	409	178.88	179.613	188.009	95.9565	95.7472	77.0883		AT3G04570	1.58781	1.89966	0.000140841	0.0272033	12	4	11	27	43	13	2.16605	0.753886	2.02358	5.37516	7.13541	2.45024
AT2G44840	-1.95581	2.60021	9.0829e-07	0.000447295	80	38	30	14	17	7	14.4403	7.16192	5.51885	2.78712	2.82098	1.31936		AT3G07970	1.60284	1.5248	2.96182e-05	0.00737734	6	9	5	18	29	15	1.08303	1.69624	0.919808	3.58344	4.81225	2.8272
AT2G45130	-2.20962	1.20164	4.29277e-05	0.010268	7	27	18	3	2	6	1.26353	5.08873	3.31131	0.59724	0.331879	1.13088		AT3G09940	1.21441	3.37577	0.000145617	0.0279584	18	54	26	82	68	78	3.24908	10.1775	4.783	16.3245	11.2839	14.7014
AT2G45760	-1.78984	2.06866	7.06739e-09	5.84528e-06	35	31	31	4	16	8	6.31765	5.84261	5.70281	0.796319	2.65504	1.50784		AT3G11340	1.16542	2.75505	1.39554e-05	0.00407372	16	29	19	58	45	41	2.88807	5.46567	3.49527	11.5466	7.46729	7.72768
AT2G46400	-1.18237	5.60826	2.69738e-14	6.44495e-11	313	336	445	138	207	142	56.4978	63.3264	81.8629	27.473	34.3495	26.7641		AT3G11430	1.55499	1.49421	0.000276501	0.0443723	7	9	4	23	28	9	1.26353	1.69624	0.735846	4.57884	4.64631	1.69632
AT2TE07145	-2.16493	0.80471	4.86255e-05	0.0113657	8	11	18	2	3	3	1.44403	2.07319	3.31131	0.39816	0.497819	0.56544		AT3G12540	3.02055	0.0155418	0.000313415	0.0490753	0	1	1	4	8	7	0	0.188471	0.183962	0.796319	1.32752	1.31936
AT3G01830	-1.30262	3.51629	1.30176e-05	0.00387001	62	81	113	21	58	27	11.1913	15.2662	20.7877	4.18068	9.6245	5.08896		AT3G16360	1.38155	3.58735	2.29099e-12	3.78965e-09	39	29	37	69	107	100	7.03966	5.46567	6.80658	13.7365	17.7556	18.848
AT3G02800	-1.0646	4.39649	3.35477e-06	0.00136115	128	146	181	49	115	58	23.1045	27.5168	33.2971	9.75491	19.0831	10.9318		AT3G17580	1.34122	1.94849	2.58498e-05	0.00669728	13	10	9	20	28	34	2.34655	1.88471	1.65565	3.9816	4.64631	6.40832
AT3G02840	-1.88324	3.19166	1.98219e-10	2.16738e-07	59	62	104	13	20	28	10.6497	11.6852	19.132	2.58804	3.31879	5.27744		AT3G28915	2.41444	0.830407	5.53444e-06	0.0019492	2	3	2	15	10	14	0.361008	0.565414	0.367923	2.9862	1.6594	2.63872
AT3G07350	-1.31263	2.9725	3.23e-07	0.000184402	59	53	62	32	27	11	10.6497	9.98899	11.4056	6.37056	4.48037	2.07328		AT3G44550	1.13752	3.52962	2.66809e-05	0.00683031	41	49	23	74	119	60	7.40067	9.2351	4.23112	14.7319	19.7468	11.3088
AT3G09870	-1.76596	3.14794	1.93376e-13	4.02423e-10	64	84	66	25	25	13	11.5523	15.8316	12.1415	4.977	4.14849	2.45024		AT3G44860	1.18213	3.10392	9.08084e-06	0.00286836	17	31	34	64	50	72	3.06857	5.84261	6.25469	12.7411	8.29699	13.5706
AT3G10930	-1.20196	3.30317	5.93072e-09	4.96886e-06	85	70	61	28	32	34	15.3429	13.193	11.2217	5.57424	5.31007	6.40832		AT3G49960	1.4616	2.6095	5.66981e-05	0.0129248	21	15	13	31	79	29	3.79059	2.82707	2.3915	6.17148	13.1092	5.46592
AT3G13270	-1.42204	1.86655	1.95533e-05	0.00539069	24	20	34	9	11	9	4.3321	3.76943	6.25469	1.79172	1.82534	1.69632		AT3G50400	1.9906	1.59788	7.82241e-05	0.0169342	11	5	1	19	39	12	1.98555	0.942357	0.183962	3.78252	6.47165	2.26176
AT3G13404	-1.39819	2.06001	3.84842e-06	0.00150466	34	27	29	13	9	12	6.13714	5.08873	5.33489	2.58804	1.49346	2.26176		AT3G53980	1.44828	3.54551	1.76168e-07	0.000105231	44	26	28	54	132	87	7.94219	4.90026	5.15093	10.7503	21.904	16.3978
AT3G21150	-1.05762	4.00102	1.03649e-06	0.000498999	101	107	136	53	79	35	18.2309	20.1664	25.0188	10.5512	13.1092	6.5968		AT3G58550	1.34346	3.32001	4.31978e-07	0.000237425	31	24	33	69	110	48	5.59563	4.52331	6.07073	13.7365	18.2534	9.04704
AT3G23230	-1.59165	2.85352	4.37512e-09	3.81416e-06	49	45	74	14	27	15	8.84471	8.48122	13.6132	2.78712	4.48037	2.8272		AT3TE45385	2.44979	0.854921	3.18587e-06	0.0013008	2	3	2	15	11	14	0.361008	0.565414	0.367923	2.9862	1.82534	2.63872
AT3G25250	-1.70351	1.44619	1.18305e-05	0.00358315	25	15	19	1	11	6	4.51261	2.82707	3.49527	0.19908	1.82534	1.13088		AT4G02090	2.77639	0.218178	0.000197973	0.0348952	1	2	0	5	14	4	0.180504	0.376943	0	0.995399	2.32316	0.75392
AT3G25790	-1.45492	1.47983	0.000146632	0.0280698	17	17	24	10	8	3	3.06857	3.20401	4.41508	1.9908	1.32752	0.56544		AT4G10380	1.10187	3.19107	5.56227e-05	0.0127246	32	38	20	42	93	62	5.77614	7.16192	3.67923	8.36135	15.4324	11.6858
AT3G27980	-2.1999	0.829872	6.57242e-05	0.0146207	10	8	20	5	3	0	1.80504	1.50777	3.67923	0.995399	0.497819	0		AT4G14060	1.5267	1.75247	5.15311e-05	0.0119582	10	5	10	30	30	13	1.80504	0.942357	1.83962	5.9724	4.97819	2.45024
AT3G29000	-2.44472	4.10642	1.54289e-39	4.97673e-35	156	149	159	39	24	22	28.1587	28.0822	29.2499	7.76411	3.98255	4.14656		AT4G14465	1.13502	3.08078	4.26928e-06	0.00159202	30	25	27	41	87	55	5.41513	4.71179	4.96696	8.16227	14.4368	10.3664
AT3G49580	-1.70732	2.34739	1.59829e-09	1.53894e-06	41	36	41	16	13	7	7.40067	6.78497	7.54243	3.18528	2.15722	1.31936		AT4G20390	1.31736	2.66055	0.000153614	0.0288081	24	13	18	41	74	25	4.3321	2.45013	3.31131	8.16227	12.2795	4.712
AT3G49620	-1.00523	4.01378	3.31965e-05	0.00811201	75	128	140	54	52	65	13.5378	24.1243	25.7546	10.7503	8.62887	12.2512		AT4G25420	2.06411	1.47946	4.24546e-07	0.000236106	10	1	4	25	22	17	1.80504	0.188471	0.735846	4.977	3.65067	3.20416
AT3G50800	-1.3737	3.91471	4.87958e-13	9.25857e-10	131	125	90	42	52	40	23.6461	23.5589	16.5565	8.36135	8.62887	7.5392		AT4G28940	1.60264	2.61225	0.000106637	0.0220492	26	12	8	50	69	23	4.69311	2.26166	1.47169	9.95399	11.4498	4.33504
AT3G50930	-1.04463	6.41161	1.1566e-07	7.17451e-05	486	624	745	226	454	240	87.7251	117.606	137.051	44.9921	75.3366	45.2352		AT4G33070	1.39055	3.34968	4.9264e-08	3.38098e-05	20	29	39	83	96	54	3.61008	5.46567	7.1745	16.5236	15.9302	10.1779
AT3G56970	-2.4331	0.673134	2.89456e-05	0.00723774	8	14	12	6	0	0	1.44403	2.6386	2.20754	1.19448	0	0		AT4G33550	2.13888	1.36222	4.49507e-07	0.000243686	4	4	5	15	28	16	0.722017	0.753886	0.919808	2.9862	4.64631	3.01568
AT3G61190	-1.40989	3.71428	2.18243e-14	5.41512e-11	97	111	94	30	40	44	17.5089	20.9203	17.2924	5.9724	6.63759	8.29312		AT4G34930	1.00857	2.47745	0.000175637	0.0320075	19	21	16	25	48	41	3.42958	3.9579	2.94339	4.977	7.96511	7.72768
AT4G04540	-1.86637	2.87777	7.76036e-05	0.0169134	26	53	99	7	28	15	4.69311	9.98899	18.2122	1.39356	4.64631	2.8272		AT4G35190	1.61465	2.04898	1.37133e-06	0.000645747	4	15	11	25	29	39	0.722017	2.82707	2.02358	4.977	4.81225	7.35072
AT4G04610	-1.153	6.57198	1.91535e-18	9.50484e-15	621	818	686	274	327	359	112.093	154.17	126.198	54.5479	54.2623	67.6643		AT4G36430	1.61381	3.27364	1.30393e-07	8.01135e-05	37	18	19	62	116	53	6.67866	3.39249	3.49527	12.343	19.249	9.98944
AT4G13395	-1.10696	3.57423	3.54306e-08	2.51176e-05	100	85	72	27	50	43	18.0504	16.0201	13.2452	5.37516	8.29699	8.10464		AT4G38080	1.21908	4.10345	1.07212e-07	6.91332e-05	63	53	48	125	179	83	11.3718	9.98899	8.83016	24.885	29.7032	15.6438
AT4G15670	-1.29795	1.83045	8.16627e-05	0.0175024	21	29	24	9	9	12	3.79059	5.46567	4.41508	1.79172	1.49346	2.26176		AT5G06630	1.44007	1.89857	0.00020086	0.0351817	9	10	10	16	46	19	1.62454	1.88471	1.83962	3.18528	7.63323	3.58112
AT4G15975	-1.26097	3.49766	2.61985e-05	0.00673354	65	60	126	26	50	30	11.7328	11.3083	23.1792	5.17608	8.29699	5.6544		AT5G07475	2.02929	1.61447	4.77876e-06	0.00174174	8	5	4	29	32	10	1.44403	0.942357	0.735846	5.77332	5.31007	1.8848
AT4G18195	-1.09454	2.25642	0.000111188	0.0227712	36	33	29	7	19	20	6.49815	6.21956	5.33489	1.39356	3.15285	3.7696		AT5G09480	1.34697	3.07294	2.03892e-05	0.00554999	28	24	21	39	105	47	5.05412	4.52331	3.86319	7.76411	17.4237	8.85856
AT4G22710	-1.28904	3.95312	7.15055e-06	0.00240258	119	84	146	27	81	38	21.48	15.8316	26.8584	5.37516	13.4411	7.16224		AT5G10580	1.9276	1.21753	1.69486e-05	0.00475387	6	4	3	11	26	14	1.08303	0.753886	0.551885	2.18988	4.31443	2.63872
AT4G25630	-1.98127	4.70691	1.69153e-14	4.36497e-11	239	226	204	57	90	25	43.1405	42.5945	37.5282	11.3476	14.9346	4.712		AT5G13580	1.33239	2.27311	9.33685e-05	0.0196843	16	14	11	36	51	18	2.88807	2.6386	2.02358	7.16688	8.46293	3.39264
AT4G29780	-1.28018	6.57783	5.42058e-23	4.9956e-19	646	744	803	333	318	253	116.606	140.223	147.721	66.2936	52.7688	47.6854		AT5G19470	2.82912	0.75265	7.25837e-07	0.000371629	2	3	0	13	15	10	0.361008	0.565414	0	2.58804	2.4891	1.8848
AT4G33960	-1.00372	3.42737	1.14696e-07	7.17451e-05	82	73	71	39	43	31	14.8013	13.7584	13.0613	7.76411	7.13541	5.84288		AT5G20860	2.38929	0.970235	9.07028e-05	0.0193116	5	2	1	17	23	4	0.902521	0.376943	0.183962	3.38436	3.81661	0.75392
AT4G39670	-1.26854	4.3482	7.36692e-07	0.000374216	98	170	191	45	91	58	17.6894	32.0401	35.1367	8.95859	15.1005	10.9318		AT5G24780	1.00381	3.9757	0.000113092	0.0229427	50	72	43	80	170	89	9.02521	13.5699	7.91035	15.9264	28.2098	16.7747
AT4TE42880	-1.42492	1.92801	0.000263198	0.0428773	25	22	35	15	2	13	4.51261	4.14637	6.43866	2.9862	0.331879	2.45024		AT5G37690	1.27003	3.59708	6.2226e-06	0.00212398	45	38	28	69	143	62	8.12269	7.16192	5.15093	13.7365	23.7294	11.6858
AT4TE61260	-2.13247	1.81675	6.86697e-10	6.9219e-07	29	31	24	4	11	4	5.23462	5.84261	4.41508	0.796319	1.82534	0.75392		AT5G41820	1.8018	0.828984	0.000318518	0.0496334	5	5	0	10	15	11	0.902521	0.942357	0	1.9908	2.4891	2.07328
AT5G03090	-5.69453	-0.074052	5.78304e-06	0.00199933	6	7	6	0	0	0	1.08303	1.3193	1.10377	0	0	0		AT5G49350	2.09376	0.900672	5.40636e-05	0.012461	5	2	2	10	21	9	0.902521	0.376943	0.367923	1.9908	3.48473	1.69632
AT5G04340	-1.36109	4.22687	4.48576e-14	1.03352e-10	177	125	129	46	58	64	31.9492	23.5589	23.731	9.15767	9.6245	12.0627		AT5G54190	1.06173	2.68588	0.000110192	0.0226392	29	10	25	40	43	51	5.23462	1.88471	4.59904	7.96319	7.13541	9.61248
AT5G15360	-5.83611	0.0161282	1.55081e-06	0.000709544	7	7	7	0	0	0	1.26353	1.3193	1.28773	0	0	0		AT5G54370	1.76873	1.01541	0.000124248	0.0245121	7	4	1	13	17	12	1.26353	0.753886	0.183962	2.58804	2.82098	2.26176
AT5G27420	-1.68385	4.9837	1.05436e-29	2.26729e-25	299	211	268	68	94	81	53.9708	39.7675	49.3017	13.5374	15.5983	15.2669		AT5G58860	1.55577	4.08037	6.38358e-08	4.33492e-05	59	40	37	129	202	76	10.6497	7.53886	6.80658	25.6813	33.5198	14.3245
AT5G35525	-1.56234	1.22049	0.000275136	0.0443723	21	12	15	9	2	5	3.79059	2.26166	2.75942	1.79172	0.331879	0.9424		AT5G59310	2.95192	1.52502	9.35115e-08	6.09355e-05	1	4	4	9	26	38	0.180504	0.753886	0.735846	1.79172	4.31443	7.16224
AT5G35935	-4.01658	1.08024	4.77856e-12	7.51889e-09	17	15	22	1	2	0	3.06857	2.82707	4.04716	0.19908	0.331879	0		AT5G63560	1.71913	3.6675	1.96872e-15	6.04791e-12	23	38	32	80	137	94	4.1516	7.16192	5.88677	15.9264	22.7337	17.7171
AT5G39670	-1.01287	4.97759	4.80753e-13	9.25857e-10	203	224	251	92	145	102	36.6424	42.2176	46.1744	18.3153	24.0613	19.225		AT5G66630	1.25697	3.91387	3.69227e-06	0.00147034	38	44	59	72	108	159	6.85916	8.29274	10.8537	14.3338	17.9215	29.9683
AT5G42380	-2.26957	3.2991	1.16572e-22	9.40037e-19	79	74	103	18	19	16	14.2598	13.9469	18.948	3.58344	3.15285	3.01568		AT5TE39195	5.4437	-0.221433	4.66973e-05	0.0109547	0	0	0	2	6	8	0	0	0	0.39816	0.995638	1.50784
AT5G45630	-1.52459	2.25672	7.98873e-06	0.00260287	52	24	31	8	12	17	9.38622	4.52331	5.70281	1.59264	1.99128	3.20416
AT5G46295	-1.36758	2.34761	4.59988e-05	0.0108302	24	38	49	9	13	21	4.3321	7.16192	9.01412	1.79172	2.15722	3.95808
AT5G47230	-1.89115	3.81704	1.51935e-13	3.37987e-10	166	100	87	27	33	35	29.9637	18.8471	16.0047	5.37516	5.47601	6.5968
AT5G50150	-2.72923	4.37479	1.60494e-62	1.03538e-57	192	185	200	33	29	25	34.6568	34.8672	36.7923	6.56964	4.81225	4.712
AT5G59820	-1.06604	5.01606	3.30398e-19	1.93769e-15	234	239	232	98	119	121	42.238	45.0447	42.6791	19.5098	19.7468	22.8061
AT5TE49540	-1.21461	2.6011	1.75175e-06	0.000785821	52	36	42	20	21	15	9.38622	6.78497	7.72639	3.9816	3.48473	2.8272
AT5TE50260	-5.53672	-0.17039	2.43523e-05	0.00633473	5	3	9	0	0	0	0.902521	0.565414	1.65565	0	0	0
AT5TE80015	-1.82812	1.31207	9.01888e-06	0.00286614	17	20	17	7	5	3	3.06857	3.76943	3.12735	1.39356	0.829699	0.56544
