# Supplementary material for: The MBD7 complex promotes expression of methylated transgenes without significantly altering their methylation status
Source: eLife journal article supplement (doi:10.7554/elife.19893), 2017-04-28
Supplement: supp [file elife_poa_e19893_Supplementary_File_4.xlsx]

## Sheet: Sheet1
Table S13. Primers
Name	Sequence
Cloning
JP5523 (MBD7 F)	CACCCCTCATTCTTCATTCTACTTC
JP5525 (MBD7 R)	AGAGCGGTCTTCGATCAGTG
JP3845 (MBD5 F)	CACCCCGATGTGGATGCTCTCATA
JP3891 (MBD5 R)	GAACATCGTTTTTCCAGCGTTTTG
HSP20-proF1	CACCTCACCTCCATCATCCTCCTC
HSP20-R3	TTAAGAGTTTTTGTGTCGGATGATGAC
HSP20T7fl F	GGAATTCCATATGAGTCTGTATAGCGACG
HSP20T7fl R	CGGGATCCTTAAGAGTTTTTGTGTCGGATG
HSP20T7N3F	CACCCATATGATGAGTCTGTATAGCGACGG
HSP20T7N3R	GGATCCTTAAACAACACCAACAGATGATCCT
HSP20T7D1F	CACCCATATGGACATTGGTGTCAACAAGGTTG
HSP20T7D1R	GGATCCTTACGGATCAACTGGTCCCG
MBD5ADfl F	CACCCATATGATGTCGAACGGCACGGAT
MBD5ADfl R	GGATCCCTAGAACATCGTTTTTCCAGCGT
EcoRI-MBD5d	AGTGAATTCCCAGGGGATGATAATTGG
MBD5d-BamHI	CGCGGATCCCTGCCGCCTAGCGCTTC
MBD6ADfl F	CACCCATATGATGTCAGATTCTGTGGCCG
MBD6ADfl R	GGATCCTCAAGCCGACACTTTACTAGGGT
MBD6d-BamHI	CGCGGATCCTCTATTGCTTCCTTGGC
EcoRI-MBD6d	AGTGAATTCGCGCCTGGAGATAATTG
MBD7ADfl F	CACCCATATGATGCAGACGAGATCCTCTTCC
MBD7ADfl R	GAATTC TTAAGAGCGGTCTTCGATCA
EcoRI-MBD7d2	AGTGAATTCTTCCGATTGCCTAGAGG
MBD7d2-BamHI	CGCGGATCCTAAGTATCTCTCAACGG
EcoRI-MBD7d3	AGTGAATTCCATTCCAAAGATTTCAGG
MBD7d3-BamHI	CGCGGATCCAAGAGGAAGCCGCTCC
HSP20-mut3	GCAGGTTCATTGATATCGAAGATATGGTACCGTATAGCGACGGATTATCGAGTGA
HSP20-mut4	TCACTCGATAATCCGTCGCTATACGGTACCATATCTTCGATATCAATGAACCTGC
PCR
Actin1-F	CCAAGCAGCATGAAGATCAA
Actin1-R	TGAACAATCGATGGACCTGA
d35SFwd	CAAAGCAAGTGGATTGATGTGA
LUC.013k Rev	TATGTGCATCTGTAAAAGCAA
NPTII-F	AGACAATCGGCTGCTCTGAT
NPTII-R	AGTGACAACGTCGAGCACAG
N_UBQ5	GGTGCTAAGAAGAGGAAGAAT
C_UBQ5	CTCCTTCTTTCTGGTAAACGT
LUCmF5	CTCCCCTCTCTAAGGAAGTCG
LUCmR5	CCAGAATGTAGCCATCCATC
d35S2 tBS Forward	AYGTTTTTAAAGTAAGTGGATTGATGTG
d35S2 tBS Reverse	AAAATTCTCRAAATCCTCTCCAAATAAAATAAAC
ChIP-qPCR
d35S CHIP F	ATTGTGAAGATAGTGGAAAAGGAAG
d35S CHIP R	AGGTCCTCTCCAAATGAAATGAA
LUC CHIP F	TCTGGATCTACTGGTCTGCCT
LUC CHIP R	AAACATTCCAAAACCGTGATG
actin2 F	GAGAGATTCAGATGCCCAGAAGTC
actin2 R	TGGATTCCAGCAGCTTCCA
